## RESEARCH PROTOCOL

# Large-scale evidence generation and evaluation across a network of databases for type 2 diabetes mellitus

Rohan Khera MD MS<sup>1,2</sup>  
Martijn J Scheumie PhD<sup>3,4</sup>  
Yuan Lu ScD<sup>1,2</sup>  
Anna Ostropolets MD<sup>5</sup>  
Ruijun Chen MD<sup>6</sup>  
George Hripcsak MD MS<sup>5,7</sup>  
Patrick B Ryan PhD<sup>3,5</sup>,  
Harlan M Krumholz MD SM<sup>1,2</sup>  
Marc A Suchard MD PhD<sup>4,8,9,10</sup>

1. Section of Cardiovascular Medicine, Department of Internal Medicine, Yale School of Medicine, New Haven, CT
2. Center for Outcomes Research and Evaluation, Yale-New Haven Hospital, New Haven, CT
3. Epidemiology Analytics, Janssen Research and Development, Titusville, NJ
4. Department of Biostatistics, UCLA Fielding School of Public Health, University of California, Los Angeles, CA
5. Department of Biomedical Informatics, Columbia University Medical Center, New York, NY
6. Department of Translational Data Science and Informatics, Geisinger, Danville, PA
7. New York-Presbyterian Hospital, New York, NY
8. Department of Biomathematics, David Geffen School of Medicine at UCLA, University of California, Los Angeles, CA
9. Department of Human Genetics, David Geffen School of Medicine at UCLA, University of California, Los Angeles, CA
10. VA Informatics and Computing Infrastructure, Department of Veterans Affairs, Salt Lake City, UT

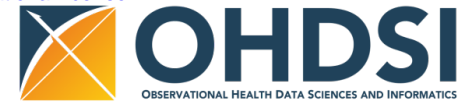

---

## Disclosures

This study is undertaken within Observational Health Data Sciences and Informatics (OHDSI), an open collaboration. **RK** is a founder of Evidence2Health, and receives grant funding from the US National Institutes of Health. **MJS** and **PBR** are employees of Janssen Research and Development and shareholders in John & Johnson. **GH** receives grant funding from the US National Institutes of Health and the US Food & Drug Administration and contracts from Janssen Research and Development. **HMK** receives grants from the US Food & Drug Administration, Medtronic and Janssen Research and Development, is co-founder of HugoHealth and chairs the Cardiac Scientific Advisory Board for UnitedHealth. **MAS** receives grant funding from the US National Institutes of Health, the US Department of Veterans Affairs and the US Food & Drug Administration and contracts from Janssen Research and Development and IQVIA.

## List of Abbreviations

---

|        |                                                                              |
|--------|------------------------------------------------------------------------------|
| CDM    | Common data model                                                            |
| DPP4   | Dipeptidyl peptidase-4                                                       |
| GLP1   | Glucagon-like peptide-1                                                      |
| IRB    | Institutional review board                                                   |
| LEGEND | Large-scale Evidence Generation and Evaluation across a Network of Databases |
| MACE   | Major adverse cardiovascular event                                           |
| MDRR   | Minimum detectable risk ratio                                                |
| OHDSI  | Observational Health Data Science and Informatics                            |
| OMOP   | Observational Medical Outcomes Partnership                                   |
| PS     | Propensity score                                                             |
| RCT    | Randomized controlled trial                                                  |
| SGLT2  | Sodium-glucose co-transporter-2                                              |
| T2DM   | Type 2 diabetes mellitus                                                     |

---



## Abstract

**Background:** Therapeutic options for type 2 diabetes mellitus (T2DM) have expanded over the last decade with the emergence of sodium-glucose co-transporter-2 (SGLT2) inhibitors and glucagon-like peptide-1 (GLP1) receptor agonists, which reduced the risk of major cardiovascular events in randomized controlled trials (RCTs). Cardiovascular evidence for older second-line agents, such as sulfonylureas, and direct head-to-head comparisons, including with dipeptidyl peptidase 4 (DPP4) inhibitors, are lacking, leaving a critical gap in our understanding of the relative effects of T2DM agents on cardiovascular risk and on patient-centered safety outcomes.

**Methods and Analysis:** The Large-Scale Evidence Generations Across a Network of Databases for T2DM (LEGEND-T2DM) initiative is a series of systematic, large-scale, multinational, real-world comparative cardiovascular effectiveness and safety studies of all 4 major second-line anti-hyperglycemic agents including SGLT2 inhibitor, GLP1 receptor agonist, DPP4 inhibitor and sulfonylureas. LEGEND-T2DM will leverage the Observational Health Data Science and Informatics (OHDSI) community that provides access to a global network of administrative claims and electronic health record (EHR) data sources. Committed data partners represent 190 million patients in the US and about 50 million internationally. LEGEND-T2DM will identify all adult, T2DM patients who newly initiate a traditionally second-line T2DM agent, including individuals with and without established cardiovascular disease. Using an active comparator, new-user cohort design, LEGEND-T2DM will execute all pairwise class-vs-class and drug-vs-drug comparisons in each data source that meet a minimum patient count of 1,000 per arm and extensive study diagnostics that assess reliability and generalizability through cohort balance and equipoise to examine the relative risk of cardiovascular and safety outcomes. The primary cardiovascular outcomes include a 3-point and a 4-point composite of major adverse cardiovascular events, and series of safety outcomes. The study will pursue data-driven, large-scale propensity adjustment for measured confounding, a large set of negative control outcome experiments to address unmeasured and systematic bias.

**Ethics and Dissemination:** The study ensures data safety through a federated analytic approach and follows research best practices, including prespecification and full disclosure of hypotheses tested and their results. LEGEND-T2DM is dedicated to open science and transparency and will publicly share all our analytic code from reproducible cohort definitions through turn-key software, enabling other research groups to leverage our methods, data, and results in order to verify and extend our findings.

## 1 Rationale and Background

The landscape of therapeutic options for type 2 diabetes mellitus (T2DM) has been dramatically transformed over the last decade [1]. The emergence of drugs targeting the



sodium-glucose co-transporter-2 (SGLT2) and the glucagon-like peptide-1 (GLP1) receptor has expanded the role of T2DM agents from lowering blood glucose to directly reducing cardiovascular risk [2]. A series of large randomized clinical trials designed to evaluate the cardiovascular safety of SGLT2 inhibitors and GLP1 receptor agonists found that use of many of these agents led to a reduction in major adverse cardiovascular events, including myocardial infarction, hospitalization for heart failure, and cardiovascular mortality [3–6]. However, other T2DM drugs widely used before the introduction of these novel agents, such as sulfonylureas, did not undergo similarly comprehensive trials to evaluate their cardiovascular efficacy or safety. Moreover, direct comparisons of newer agents with dipeptidyl peptidase-4 (DPP4) inhibitors, with neutral effects on major cardiovascular outcomes [7–10], have not been conducted. Nevertheless, DPP4 inhibitors and sulfonylureas continue to be used in clinical practice and are recommended as second-line T2DM agents in national clinical practice guidelines.

Several challenges remain in formulating T2DM treatment recommendations based on existing evidence [11]. First, trials of novel agents did not pursue head-to-head comparisons to older agents and were instead designed as additive treatments on the background of commonly used T2DM agents. Therefore, the relative cardiovascular efficacy and safety of novel compared with older agents is not known, and indirect estimates have relied on summary-level data restricted to common comparators [12–14] and are less reliable [15,16]. Second, trials of novel agents have tested individual drugs against placebo, but have not directly compared SGLT2 inhibitors with GLP1 receptor agonists in reducing adverse cardiovascular event risk. Moreover, there is no evidence to guide the use of individual drugs within each class and across different drug classes, particularly among patients at lower cardiovascular risk than recruited in clinical trials. Third, randomized trials focused on cardiovascular efficacy and safety, but were not powered to adequately assess the safety of these agents across a spectrum of non-cardiovascular outcomes. Finally, restricted enrollment across regions, and subgroups of age, sex, and race further limits the efficacy and safety assessment that may guide individual patients' treatment.

Evidence gaps from these trials also pose a challenge in designing treatment algorithms, which rely on comparative effectiveness and safety of drugs. Perhaps, as a result, there is large variation in clinical practice guidelines and in clinical practice with regard to these medications, with many patients initiated on the newer therapies and many others treated with older regimens [17–21]. Among the second-line options, there is much variation with respect to the order of drugs used. This lack of consensus about the best approach provides an opportunity for systematic, large-scale observational studies.

## 2 Study Objectives

To inform critical decisions facing patients with diabetes, their caregivers, clinicians, policymakers and healthcare system leaders, we have launched the Large-Scale Evidence



Generation and Evaluation across a Network of Databases for Diabetes (LEGEND-T2DM) initiative to execute a series of comprehensive observational studies to compare cardiovascular outcome rates and safety of second-line T2DM glucose-lowering agents. Specifically, these studies aim

1. To determine, through systematic evaluation, the comparative effectiveness of traditionally second-line T2DM agents, SGLT2 inhibitors and GLP1 receptor agonists, with each other and with DPP4 inhibitors and sulfonylureas, for cardiovascular outcomes.
2. To determine, through systematic evaluation, the comparative safety of traditionally second-line T2DM agents among patients with T2DM.
3. To assess heterogeneity in effectiveness and safety of traditionally second-line T2DM agents among key patient subgroups: Using stratified patient cohorts, we will quantify differential effectiveness and safety across subgroups of patients based on age, sex, race, renal impairment, and baseline cardiovascular risk.

### 3 Research Methods

LEGEND-T2DM will execute three systematic, large-scale observational studies of second-line T2DM agents to estimate the relative risks of cardiovascular effectiveness and safety outcomes.

1. The **Class-vs-Class Study** will provide all pairwise comparisons between the four major T2DM agent classes to evaluate their comparative effects on cardiovascular risk (Objective 1) and patient-centered safety outcomes (Objective 2);
2. The **Drug-vs-Drug Study** will furnish head-to-head pairwise comparisons between individual agents within and across classes (both Objectives 1 and 2); and
3. The **Heterogeneity Study** will refine these comparisons for T2DM patients for important subgroups (Objective 3). In contrast to a single comparison approach, LEGEND-T2DM will provide a comprehensive view of the findings and their consistency across populations, drugs, and outcomes. We will model each study on our successful collaborative research evaluating the comparative effectiveness of antihypertensives recently published in *The Lancet* [22].

Table 1 list the four major T2DM agent classes and the individual agents licensed in the U.S. within each class. We will examine all  $\binom{4}{2} = 6$  class-wise comparisons and all  $\binom{5+6+4+7}{2} = 231$  ingredient-wise comparisons.

For each comparison, we are interested in the relative risk of each of the cardiovascular and safety outcomes listed in Table 3.



Table 1: T2DM drug classes and individual agents within each class

| DPP4 inhibitors | GLP1 receptor antagonists | SGLT2 inhibitors | Sulfonylureas  |
|-----------------|---------------------------|------------------|----------------|
| alogliptin      | albiglutide               | canagliflozin    | chlorpropamide |
| linagliptin     | dulaglutide               | dapagliflozin    | glimepiride    |
| saxagliptin     | exenatide                 | empagliflozin    | glipizide      |
| sitagliptin     | liraglutide               | ertugliflozin    | gliquidone     |
| vildagliptin    | lixisenatide              |                  | glyburide      |
|                 | semaglutide               |                  | tolazamide     |
|                 |                           |                  | tolbutamide    |

### 3.1 Study Design

For each study, we will employ an active comparator, new-user cohort design [23–25]. New-user cohort design is advocated as the primary design to be considered for comparative effectiveness and drug safety [26–28]. By identifying patients who start a new treatment course and using therapy initiation as the start of follow-up, the new-user design models an randomized controlled trial (RCT) where treatment commences at the index study visit. Exploiting such an index date allows a clear separation of baseline patient characteristics that occur prior to index date and are usable as covariates in the analysis without concern of inadvertently introducing mediator variables that arise between exposure and outcome [29]. Excluding prevalent users as those without a sufficient washout period prior to first exposure occurrence further reduces bias due to balancing mediators on the causal pathway, time-varying hazards, and depletion of susceptibles [28,30]. Our systematic framework across studies further will address residual confounding, publication bias, and p-hacking using data-driven, large-scale propensity adjustment for measured confounding [31], a large set of negative control outcome experiments to address unmeasured and systematic bias [32–34], and full disclosure of hypotheses tested [35]. Figure 1 illustrates our design for all studies that the following sections describe in more detail.

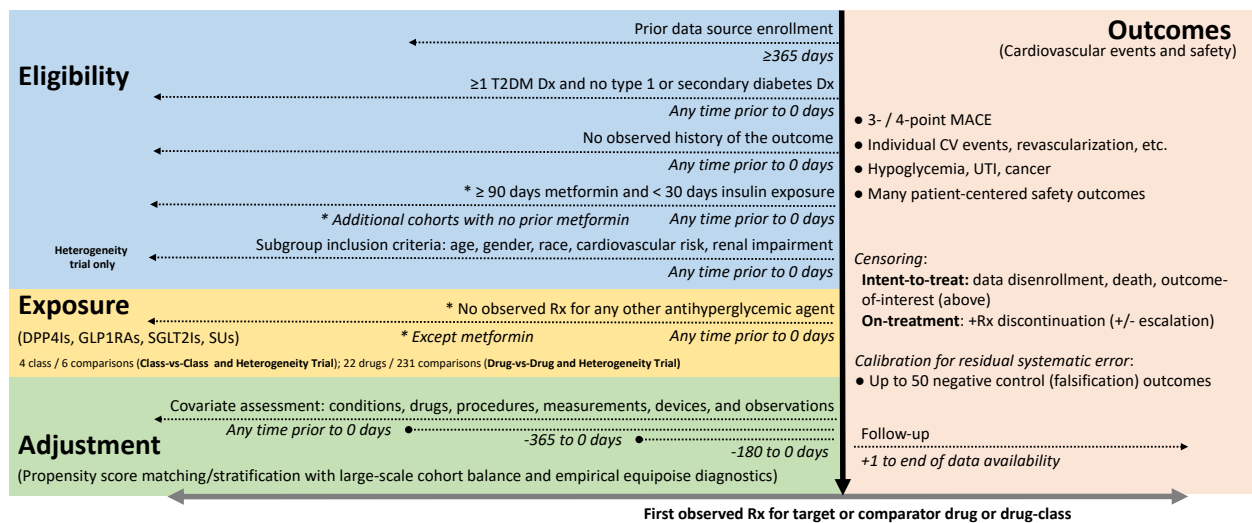

Figure 1: Schematic of LEGEND-T2DM new-user cohort design for the Class-vs-Class, Drug-vs-Drug and Heterogeneity studies.

### 3.2 Data Sources

We will execute LEGEND-T2DM as a series of OHDSI network studies. All data partners within OHDSI are encouraged to participate voluntarily and can do so conveniently, because of the community's shared Observational Medical Outcomes Partnership (OMOP) common data model (CDM) and OHDSI tool-stack. Many OHDSI community data partners have already committed to participate and we will recruit further data partners through OHDSI's standard recruitment process, which includes protocol publication on OHDSI's GitHub, an announcement in OHDSI's research forum, presentation at the weekly OHDSI all-hands-on meeting and direct requests to data holders.

Table 2 lists the 13 already committed data sources for LEGEND-T2DM; these sources encompass a large variety of practice types and populations. For each data source, we report a brief description and size of the population it represents and its patient capture process and start date. While the earliest patient capture begins in 1989 (CUIMC), the vast majority come from the mid-2000s to today, providing almost two decades of T2DM treatment coverage. US populations include those commercially and publicly insured, enriched for older individuals (MDCR, VA), lower socioeconomic status (MDCD), and racially diverse (VA  $>20\%$  Black or African American, CUIMC 8%). The US data sources may capture the same patients across multiple sources. Different views of the same patients are an advantage in capturing the diversity of real-world health events that patients experience. Across CCAE (commercially insured), MCDR (Medicare) and MCDL (Medicaid), we expect little overlap in terms of the same observations recorded at the same time for a patient; patients can flow between sources (e.g., a CCAE patient who retires can opt-in to become an MDCR patient), but the enrollment time periods stand distinct. On the other hand, Op-



tum, PanTher, OpenClaims, CUIMC and YNHHS may overlap in time with the other US data sources. While it remains against licensing agreements to attempt to link patients between most data sources, Optum reports <20% overlap between their claims and EHR data sources that is reassuringly small. All data sources will receive institutional review board approval or exemption for their participation before executing LEGEND-T2DM.

### 3.3 Study Population

We will include all subjects in a data source who meet inclusion criteria for one or more traditionally second-line T2DM agent exposure cohorts. Broadly, these cohorts will consist of T2DM patients either with or without prior metformin monotherapy who initiate treatment with one of the 22 drug ingredients that comprise the DPP4 inhibitor, GLP1 receptor agonist, SGT2 inhibitor and sulfonylurea drug classes (Table 1). We do not consider thiazolidinediones given their known association with a risk of heart failure and bladder cancer [36,37]. We describe specific definitions for exposure cohorts for each study in the following sections.

### 3.4 Exposure Comparators

#### 3.4.1 Class-vs-Class Study comparisons

The **Class-vs-Class** Study will construct four exposure cohorts for new-users of any drug ingredient within the four traditionally second-line drug classes in Table 1. Cohort entry (index date) for each patient is their first observed exposure to any drug ingredient for the four second-line drug classes. Consistent with an idealized target trial for T2DM therapy and cardiovascular risk [38,39], inclusion criteria for patients based on the index date will include:

- T2DM diagnosis and no Type 1 or secondary diabetes mellitus diagnosis before the index date;
- At least 1 year of observation time before the index date (to improve new-user sensitivity); and
- No prior drug exposure to a comparator second-line or other antihyperglycemic agent (i.e. thiazolidinediones, acarbose, acetohexamide, bromocriptine, glibornuride, miglitol and nateglinide) or > 30 days insulin exposure before index date.

We will construct and compare separately cohorts patients either with

- At least 3 months of metformin use before the index date,



Table 2: Committed LEGEND-T2DM data sources and the populations they cover.

| Data source                                              | Population                                         | Patients | History | Data capture process and short description                                                                                                                                                                                                            |
|----------------------------------------------------------|----------------------------------------------------|----------|---------|-------------------------------------------------------------------------------------------------------------------------------------------------------------------------------------------------------------------------------------------------------|
| <b>Administrative claims</b>                             |                                                    |          |         |                                                                                                                                                                                                                                                       |
| IBM MarketScan Commercial Claims and Encounters (CCAE)   | Commercially insured, < 65 years                   | 142M     | 2000 –  | Adjudicated health insurance claims (e.g. inpatient, outpatient, and outpatient pharmacy) from large employers and health plans who provide private healthcare coverage to employees, their spouses and dependents.                                   |
| IBM MarketScan Medicare Supplemental Database (MDCR)     | Commercially insured, 65+\$ years                  | 10M      | 2000 –  | Adjudicated health insurance claims of retirees with primary or Medicare supplemental coverage through privately insured fee-for-service, point-of-service or capitated health plans.                                                                 |
| IBM MarketScan Multi-State Medicaid Database (MDCD)      | Medicaid enrollees, racially diverse               | 26M      | 2006 –  | Adjudicated health insurance claims for Medicaid enrollees from multiple states and includes hospital discharge diagnoses, outpatient diagnoses and procedures, and outpatient pharmacy claims.                                                       |
| IQVIA Open Claims (IOC)                                  | General                                            | 160M     | 2010 –  | Pre-adjudicated claims at the anonymized patient-level collected from office-based physicians and specialists via office management software and clearinghouse switch sources for the purpose of reimbursement.                                       |
| Japan Medical Data Center (JMDC)                         | Japan, general                                     | 5.5M     | 2005 –  | Data from 60 society-managed health insurance plans covering workers aged 18 to 65 and their dependents.                                                                                                                                              |
| Korea National Health Insurance Service (NHIS)           | 2% random sample of South Korea                    | 1M       | 2002 –  | National administrative claims database covering the South Korean population.                                                                                                                                                                         |
| Optum Clinformatics Data Mart (Optum)                    | Commercially or Medicare insured                   | 85M      | 2000 –  | Inpatient and outpatient healthcare insurance claims.                                                                                                                                                                                                 |
| <b>Electronic health records (EHRs)</b>                  |                                                    |          |         |                                                                                                                                                                                                                                                       |
| Columbia University Irving Medical Center (CIUMC)        | Academic medical center patients, racially diverse | 6M       | 1989 –  | General practice, specialists and inpatient hospital services from the New York-Presbyterian hospital and affiliated academic physician practices in New York.                                                                                        |
| Department of Veterans Affairs (VA)                      | Veterans, older, racially diverse                  | 12M      | 2000 –  | National VA health care system, the largest integrated provider of medical services in the US, provided at 170 VA medical centers and 1,063 outpatient sites.                                                                                         |
| Information System for Research in Primary Care (SIDIAP) | 80% of all Catalonia (Spain)                       | 7.7M     | 2006 –  | Primary care partially linked to inpatient data with pharmacy dispensations and primary care laboratories. Healthcare is universal and taxpayer funded in the region, and PCPs are gatekeepers for all care and responsible for repeat prescriptions. |
| IQVIA Disease Analyzer Germany (DAG)                     | Germany, general                                   | 37M      | 1992 –  | Collection from patient management software used by general practitioners and selected specialists to document patients' medical records within their office-based practice during a visit.                                                           |
| Optum Electronic Health Records (OptumEHR)               | US, general                                        | 93M      | 2006 –  | Clinical information, prescriptions, lab results, vital signs, body measurements, diagnoses and procedures derived from clinical notes using natural language processing.                                                                             |
| Yale New Haven Health System (YNHHS)                     | Academic medical center patients                   | 2M       | 2013 –  | General practice, specialists and inpatient hospital services from the YNHHS in Connecticut.                                                                                                                                                          |

or

- No prior metformin use before the index date.

In the first case, three months of metformin is consistent with ADA guidelines [40]. In the second case, we are interested in relative effectiveness and safety of these traditionally second-line agents in patients who initiate their treatments without first using metformin. We purposefully do not automatically exclude or restrict to patients with a history of myocardial infarction, stroke or other major cardiovascular events, which will allow us to report relative effectiveness and safety for individuals with both low or moderate and high cardiovascular risk. Likewise, we do not automatically exclude or restrict to individuals with severe renal impairment [41]. We will use cohort diagnostics, such as achieving covariate balance and clinical empirical equipoise between exposure cohorts (Section 4) and stakeholder input to guide the possible need to exclude other prior diagnoses, such as congestive heart failure, pancreatitis or cancer [41].

Appendix A.1 reports the complete OHDSI ATLAS cohort description for new-users of DDP4 inhibitors with prior metformin use. This description lists complete specification of cohort entry events, additional inclusion criteria, cohort exit events, and all associated standard OMOP CDM concept code sets used in the definition. We generate programmatically equivalent cohort definitions for new-others of each drug class with and without prior metformin use. ATLAS then automatically translates these definitions into network-deployable SQL source code. Appendix A.2 lists the inclusion criteria modifier for no prior metformin use.

Of note, the inclusion criteria do not directly incorporate quantitative measures of poor glycemic control, such as one or more elevated serum HbA1c measurements; such laboratory values are irregularly captured in large claims and even EHR data sources. Older ADA guidelines (but not since 2020 for patients with cardiovascular disease [42]) advise escalating to a second-line agent only when glycemic control is not met with metformin monotherapy, nicely mirroring our cohort design for our historical data. We will conduct sensitivity analyses involving available HbA1c measurements to demonstrate their balance between exposure cohorts (described later in Section 4). In the unlikely event that balance is not met, we will consider an inclusion criterion of at least two HbA1c measurements  $\geq 7\%$  within 6 months before the index [39]. We will also conduct sensitivity analyses to assess prior insulin use exclusions, bearing in mind difficulties in assessing insulin use end-dates.

For each data source, we will then execute all  $2 \times \binom{4}{2} = 6$  pairwise class comparisons for which the data source yields  $\geq 1,000$  patients in each arm. Significantly fewer numbers of patients strongly suggest data source-specific differences in prescribing practices that may introduce residual bias and sufficient samples sizes are required to construct effective propensity score models [43].

### 3.4.2 Drug-vs-Drug Study comparisons

The **Drug-vs-Drug Study** will construct  $2 \times 22$  exposure cohorts for new-users of each drug ingredient in Table 1. We will apply the same cohort definition, inclusion criteria and patient count minimum as described in Section 3.4.1.

For each data source, we will then execute all  $2 \times \binom{22}{2} = 462$  pairwise drug comparisons. While we will publicly report studies results for all pairwise comparisons, we will focus primary clinical interpretation and scientific publishing to the  $2 \times \binom{5}{2}$  [within DPP4Is] +  $2 \times \binom{6}{2}$  [within GLPR1RAs] +  $2 \times \binom{4}{2}$  [within SGLT2Is] +  $2 \times \binom{7}{2}$  [within SUs] = 104 comparisons that pit drugs within the same class against each other, as well as across-class comparisons that stakeholders deem pertinent given their experiences.

Appendix A.5 reports the complete OHDSI ATLAS cohort description for new-users of alogliptin with prior metformin use. Again, we programmatically construct all new-user drug-level cohort and automatically translate into SQL.

### 3.4.3 Heterogeneity Study comparisons

The **Heterogeneity Study** will further stratify all 237 class- and drug-level exposure cohorts in Sections 3.4.1 and 3.4.2 by clinically important patient characteristics that modify cardiovascular risk or relative treatment heterogeneity to provide patient-focused treatment recommendations. These factors will include:

- Age (18 - 44 / 45 - 64 /  $\geq 65$  at the index date)
- Gender (women / men)
- Race (African American or black)
- Cardiovascular risk (low or moderate/high, defined by established cardiovascular disease at the index date)
- Renal impairment (at the index date)

We will define patients at high cardiovascular risk as those who fulfill at index date an established cardiovascular disease (CVD) definition that has been previously developed and validated for risk stratification among new-users of second-line T2DM agents [44]. Under this definition, established CVD means having at least 1 diagnosis code for a condition indicating cardiovascular disease, such as atherosclerotic vascular disease, cerebrovascular disease, ischemic heart disease or peripheral vascular disease, or having undergone at least 1 procedure indicating cardiovascular disease, such as percutaneous coronary intervention, coronary artery bypass graft or revascularization, any time on or prior to the exposure start. Likewise, we will define renal impairment through diagnosis codes for chronic kidney disease and end-stage renal disease, dialysis procedures, and laboratory measurements of estimated glomerular filtration rate, serum creatinine and urine albumin.



Appendix A.4 presents complete OHDSI ATLAS specifications for these subgroups, including all standard OMOP CDM concept codes defining cardiovascular risk and renal disease.

### 3.4.4 Validation

We will validate exposure cohorts and aggregate drug utilization using comprehensive cohort characterization tools against both claims and EHR data sources. Chief among these tools stands OHDSI's `CohortDiagnostic` package (github). For any cohort and data source mapped to OMOP CDM, this package systematically generates incidence new-user rates (stratified by age, gender, and calendar year), cohort characteristics (all comorbidities, drug use, procedures, health utilization) and the actual codes found in the data triggering the various rules in the cohort definitions. This can allow researchers and stakeholders to understand the heterogeneity of source coding for exposures and health outcomes as well as the impact of various inclusion criteria on overall cohort counts (details described in Section 4).

## 3.5 Outcomes

Across all data sources and pairwise exposure cohorts, we will assess relative risks of 32 cardiovascular and patient-centered outcomes (Table 3). Primary outcomes of interest are:

- 3-point major adverse cardiovascular events (MACE), including acute myocardial infarction, stroke, and sudden cardiac death, and
- 4-point MACE that additionally includes heart failure hospitalization.

Secondary outcomes include:

- individual MACE components,
- acute renal failure,
- revascularization

In data sources with laboratory measurements, secondary outcomes further include:

- glycemic control, and
- measured renal dysfunction

We will also study second-line T2DM drug side-effects and safety concerns highlighted in the 2018 ADA guidelines [40] and from RCTs, including:



- abnormal weight change,
- genitourinary (GU) infection,
- various cancers, and
- hypoglycemia.

We will employ the same level of systematic rigor in studying outcomes regardless of their primary or secondary label.

A majority of outcome definitions have been previously implemented and validated in our own work [22,44–48] based heavily on prior development by others (see references in Table 3 [44–101]). To assess across-source consistency and general clinical validity, we will characterize outcome incidence, stratified by age, sex and index year for each data source.

Table 3: LEGEND-T2DM study outcomes

| Phenotype                               | Brief logical description                                                                                                                               | Prior development |
|-----------------------------------------|---------------------------------------------------------------------------------------------------------------------------------------------------------|-------------------|
| <b>Cardiovascular outcomes</b>          |                                                                                                                                                         |                   |
| 3-point MACE                            | Condition record of acute myocardial infarction, hemorrhagic or ischemic stroke or sudden cardiac death during an inpatient or ER visit                 | [49–61]           |
| 4-point MACE                            | 3-Point MACE + inpatient or ER visit (hospitalization) with heart failure condition record                                                              | [44,49–67]        |
| Acute myocardial infarction             | Condition record of acute myocardial infarction during an inpatient or ER visit                                                                         | [49–54]           |
| Acute renal failure                     | Condition record of acute renal failure during an inpatient or ER visit                                                                                 | [47,68–75]        |
| Glycemic control                        | First hemoglobin A1c measurement with value $\leq 7\%$                                                                                                  | [76]              |
| Hospitalization with heart failure      | Inpatient or ER visit with heart failure condition record                                                                                               | [44,62–67]        |
| Measured renal dysfunction              | First creatinine measurement with value $> 3$ mg/dL                                                                                                     | [75]              |
| Revascularization                       | Procedure record of percutaneous coronary intervention or coronary artery bypass grafting during an inpatient or ER visit                               | [45]              |
| Stroke                                  | Condition record of hemorrhagic or ischemic stroke during an inpatient or ER visit                                                                      | [55–60]           |
| Sudden cardiac death                    | Condition record of sudden cardiac death during an inpatient or ER visit                                                                                | [52,61]           |
| <b>Patient-centered safety outcomes</b> |                                                                                                                                                         |                   |
| Abnormal weight gain                    | Abnormal weight gain record of any type; successive records with $> 90$ day gap are considered independent episodes; note, weight measurements not used | [77]              |
| Abnormal weight loss                    | Abnormal weight loss record of any type; successive records with $> 90$ day gap are considered independent episodes; note, weight measurements not used | [78]              |
| Acute pancreatitis                      | Condition record of acute pancreatitis during an inpatient or ER visit                                                                                  | [79–82]           |
| All-cause mortality                     | Death record of any type                                                                                                                                | [52,83,84]        |
| Bladder cancer                          | Malignant tumor of urinary bladder condition record of any type; limited to earliest event per person                                                   |                   |
| Bone fracture                           | Bone fracture condition record of any type; successive records with $> 90$ day gap are considered independent episodes                                  |                   |
| Breast cancer                           | Malignant tumor of breast condition record of any type; limited to earliest event per person                                                            |                   |
| Diabetic ketoacidosis                   | Diabetic ketoacidosis condition record during an inpatient or ER visit                                                                                  | [46,85]           |
| Diarrhea                                | Diarrhea condition record of any type; successive records with $> 30$ day gap are considered independent episodes                                       | [86–88]           |
| Genitourinary infection                 | Condition record of any type of genital or urinary tract infection during an outpatient or ER visit                                                     | [89]              |

(Continued on Next Page...)



Table 3: LEGEND-T2DM study outcomes (*continued*)

| Phenotype                  | Brief logical description                                                                                                                         | Prior development |
|----------------------------|---------------------------------------------------------------------------------------------------------------------------------------------------|-------------------|
| Hyperkalemia               | Condition record for hyperkalemia or potassium measurements > 5.6 mmol/L; successive records with >90 day gap are considered independent episodes | [90–92]           |
| Hypoglycemia               | Hypoglycemia condition record of any type; successive records with > 90 day gap are considered independent episodes                               | [93]              |
| Hypotension                | Hypotension condition record of any type; successive records with > 90 day gap are considered independent episodes                                | [94]              |
| Joint pain                 | Joint pain condition record of any type; successive records with > 90 days gap are considered independent episodes                                |                   |
| Lower extremity amputation | Procedure record of below knee lower extremity amputation during inpatient or outpatient visit                                                    | [44,48]           |
| Nausea                     | Nausea condition record of any type; successive records with > 30 day gap are considered independent episodes                                     | [95–97]           |
| Peripheral edema           | Edema condition record of any type; successive records with > 180 day gap are considered independent episodes                                     |                   |
| Photosensitivity           | Condition record of drug-induced photosensitivity during any type of visit                                                                        |                   |
| Renal cancer               | Primary malignant neoplasm of kidney condition record of any type; limited to earliest event per person                                           |                   |
| Thyroid tumor              | Neoplasm of thyroid gland condition record of any type; limited to earliest event per person                                                      |                   |
| Venous thromboembolism     | Venous thromboembolism condition record of any type; successive records with > 180 day gap are considered independent episodes                    | [98–101]          |
| Vomiting                   | Vomiting condition record of any type; successive records with > 30 day gap are considered independent episodes                                   | [95–97]           |

## 3.6 Analysis

### 3.6.1 Contemporary utilization of drug classes and individual agents

For all cohorts in the three studies, we will describe overall utilization as well as temporal trends in the use of each drug class and agents within the class. Further, we will evaluate these trends in patient groups by age (18-44 / 45-64 /  $\geq 65$  years), gender, race and geographic regions. Since the emergence of novel medications in the management of type 2 DM in 2014, there has been a rapid expansion in both the number of drug classes and individual agents. These data will provide insight into the current patterns of use and possible disparities. These data are critical to guide the real-world application of treatment decision pathways for the treatment of T2DM patients.

Specifically, we will calculate and validate aggregate drug utilization using the OHDSI's CohortDiagnostic package against both claims and EHR data sources. The CohortDiagnostics package works in two steps: 1) Generate the utilization results and diagnostics against a data source and 2) Explore the generated utilization and diagnostics in a user-friendly graphical interface R-Shiny app. Through the interface, one can explore patient profiles of a random sample of subjects in a cohort. These diagnostics provide a consistent methodology to evaluate cohort definitions/phenotype algorithms across a variety of observational databases. This will enable researchers and stakeholders to become



informed on the appropriateness of including specific data sources within analyses, exposing potential risks related to heterogeneity and variability in patient care delivery that, when not addressed in the design, could result in errors such as highly correlated covariates in propensity score matching of a target and a comparator cohort. Thus, the added value of this approach is two-fold in terms of exposing data quality for a study question and ensuring face validity checks are performed on proposed covariates to be used for balancing propensity scores.

### **3.6.2 Relative risk of cardiovascular and patient-centered outcomes**

For all three studies, we will execute a systematic process to estimate the relative risk of cardiovascular and patient-centered outcomes between new-users of second-line T2DM agents. The process will adjust for measured confounding, control from further residual (unmeasured) bias and accommodate important design choices to best emulate the nearly impossible to execute, idealized RCT that our stakeholders envision across data source populations, comparators, outcomes and subgroups.

To adjust for potential measured confounding and improve the balance between cohorts, we will build large-scale propensity score (PS) models [102] for each pairwise comparison and data source using a consistent data-driven process through regularized regression [31]. This process engineers a large set of predefined baseline patient characteristics, including age, gender, race, index month/year and other demographics and prior conditions, drug exposures, procedures, laboratory measurements and health service utilization behaviors, to provide the most accurate prediction of treatment and balance patient cohorts across many characteristics. Construction of condition, drug, procedures and observations include occurrences within 365, 180 and 30 days prior to index date and are aggregated at several SNOMED (conditions) and ingredient/ATC class (drugs) levels. Other demographic measures include comorbidity risk scores (Charlson, DCSI, CHADS2, CHAD2VASc). From prior work, feature counts have ranged in the 1,000s - 10,000s, and these large-scale PS models have outperformed hdPS [103] in simulation and real-world examples [31].

We will:

- Exclude patients who have experienced the outcome prior to their index date,
- Stratify and variable-ratio match patients by PS, and
- Use Cox proportional hazards models

to estimate hazard ratios (HRs) between alternative target and comparator treatments for the risk of each outcome in each data source. The regression will condition on the PS strata/matching-unit with treatment allocation as the sole explanatory variable and censor patients at the end of their time-at-risk (TAR) or data source observation period. We will



prefer stratification over matching if both sufficiently balance patients (see Section 4), as the former optimizes patient inclusions and thus generalizability.

We will execute each comparison using three different TAR definitions, reflecting different and important causal contrasts:

- Intent-to-treat (TAR: index + 1 → end of observation) captures both direct treatment effects and (long-term) behavioral/treatment changes that initial assignment triggers [104];
- On-treatment-1 (TAR: index + 1 → treatment discontinuation) is more patient-centered [105] and captures direct treatment effect while allowing for escalation with additional T2DM agents; and
- On-treatment-2 (TAR: index + 1 → discontinuation or escalation with T2DM agents) carries the least possible confounding with other concurrent T2DM agents.

Our “on-treatment” is often called “per-protocol” [106]. Systematically executing with multiple causal contrasts enables us to identify potential biases that missing prescription data, treatment escalation and behavioral changes introduce, while preserving the ease of intent-to-treat interpretation and power if the data demonstrate them as unbiased. Appendix A.3 reports the modified cohort exit rule for the on-treatment-2 TAR.

We will aggregate HR estimates across non-overlapping data sources to produce meta-analytic estimates using a random-effects meta-analysis [107]. This classic meta-analysis assumes that per-data source likelihoods are approximately normally distributed [108]. This assumption fails when outcomes are rare as we expect for some safety events. Here, our recent research shows that as the number of data sources increases, the non-normality effect increases to where coverage of 95% confidence intervals (CIs) can be as low as 5%. To counter this, we will also apply a Bayesian meta-analysis model [109,110] that neither assumes normality nor requires patient-level data sharing by building on composite likelihood methods [111] and enables us to introduce appropriate overlap weights between data sources.

Residual study bias from unmeasured and systematic sources often remains in observational studies even after controlling for measured confounding through PS-adjustment [32,33]. For each comparison-outcome effect, we will conduct negative control (falsification) outcome experiments, where the null hypothesis of no effect is believed to be true, using approximately 100 controls. We identified these controls through a data-rich algorithm [112] that identifies prevalent OMOP condition concept occurrences that lack evidence of association with exposures in published literature, drug-product labeling and spontaneous reports, and were then adjudicated by clinical review. We previously validated 60 of the controls in LEGEND-HTN [22]. Appendix C lists these negative controls and their OMOP condition concept IDs.

Using the empirical null distributions from these experiments, we will calibrate each study effect HR estimate, its 95% CI and the  $p$ -value to reject the null hypothesis of no differential





effect [34]. We will declare an HR as significantly different from no effect when its calibrated  $p < 0.05$  without correcting for multiple testing. Finally, blinded to all trial results, study investigators will evaluate study diagnostics for all comparisons to assess if they were likely to yield unbiased estimates (Section 4).

### 3.6.3 Sensitivity analyses and missingness

Because of the potential confounding effect of glycemic control at baseline between treatment choice and outcomes and to better understand the impact of limited glucose level measurements on effectiveness and safety estimation that arises in administrative claims and some EHR data, we will perform pre-specified sensitivity analyses for all studies within data sources that contain reliable glucose or hemoglobin A1c measurements. Within a study, for each exposure pair, we will first rebuild PS models where we additionally include baseline glucose or hemoglobin A1c measurements as patient characteristics, stratify or match patients under the new PS models that directly adjust for potential confounding by glycemic control and then estimate effectiveness and safety HRs.

A limitation of the Cox model is that no doubly robust procedure is believed to exist for estimating HRs, due to their non-collapsibility [113]. Doubly robust procedures combine baseline patient characteristic-adjusted outcome and PS models to control for confounding and, in theory, remain unbiased when either (but not necessarily both) model is correctly specified [114]. Doubly robust procedures do exist for hazard differences [113] and we will validate the appropriateness of our univariable Cox modeling by comparing estimate differences under an additive hazards model [116] with and without doubly robust-adjustment [117]. In practice, however, neither the outcome nor PS model is correctly specified, leading to systematic error in the observational setting.

Missing data of potential concern are patient demographics (gender, age, race) for our inclusion criteria. We will include only individuals whose baseline eligibility can be characterized that will most notably influence race subgroup assessments in the **Heterogeneity Study**. No further missing data can arise in our large-scale PS models because all features, with the exception of demographics, simply indicate the presence or absence of health records in a given time-period. Finally, we limit the impact of missing data, such as prescription information, relating to exposure time-at-risk by entertaining multiple definitions [29]. In all reports, we will clearly tabulate numbers of missing observations and patient attrition.

## 4 Sample Size and Study Power

Within each data source, we will execute all comparisons with  $\geq 1,000$  eligible patients per arm. Blinded to effect estimates, investigators and stakeholders will evaluate extensive



study diagnostics for each comparison to assess reliability and generalizability, and only report risk estimates that pass [25,35]. These diagnostics will include

1. Minimum detectable risk ratio (MDRR) as a typical proxy for power,
2. Preference score distributions to evaluate empirical equipoise and population generalizability,
3. Extensive patient characteristics to evaluate cohort balance before and after PS-adjustment,
4. Negative control calibration plots to assess residual bias, and
5. Kaplan-Meier plots to examine hazard ratio proportionality assumptions.

We will define cohorts to stand in empirical equipoise if the majority of patients carry preference scores between 0.3 and 0.7 and to achieve balance if all after-adjustment characteristics return absolute standardized mean differences  $< 0.1$  [118].

## 5 Strengths and Limitations

### 5.1 Strengths

LEGEND-T2DM is, to our knowledge, the largest and most comprehensive study to provide evidence about the comparative effectiveness and safety of second-line T2DM agents. The LEGEND-T2DM studies will encompass over 1 million patients initiating second-line T2DM agents across at least 13 databases from 5 countries and will examine all pairwise comparisons between the four second-line drug classes against a panel of TODO health outcomes. Through an international network, LEGEND-T2DM seeks to take advantage of disparate health databases drawn from different sources and across a range of countries and practice settings. These large-scale and unfiltered populations better represent real-world practice than the restricted study populations in prescribed treatment and follow-up settings from RCTs. Our use of the OMOP CDM allows extension of the LEGEND-T2DM experiment to future databases and allows replication of these results on licensable databases that were used in this experiment, while still maintaining patient privacy on patient-level data.

LEGEND-T2DM further advances the statistically rigorous and empirically validated methods we have developed in OHDSI that specifically address bias inherent in observational studies and allow for reliable causal inference. Patient characteristics and their treatment choices are likely to confound comparative effectiveness and safety estimates. Our approach combines active comparator new-user designs that emulate randomized clinical trials with large-scale propensity adjustment for measured confounding, a large set of negative control outcome experiments to address unmeasured and systematic bias, and full disclosure of hypotheses tested.



Each LEGEND-T2DM aim will represent evidence synthesis from a large number of bespoke studies across multiple data sources. Addressing questions one bespoke study at a time is prone to errors arising from multiple testing, random variation in effect estimates and publication bias. LEGEND-T2DM is designed to avoid these concerns through methodologic best practices [119] with full study diagnostics and external replication.

Through open science, LEGEND-T2DM will allow any interested investigators to engage as partners in our work at many levels. We will publicly develop all protocols and analytic code. This invites additional data custodians to participate in LEGEND-T2DM and enables others to modify and reuse our approach for other investigations. We will also host real-time access to all study result artifacts for outside analysis and interpretation. Such an open science framework ensures a feed-forward effect on other scientific contributions in the community. Collectively, LEGEND-T2DM will generate patient-centered, high quality, generalizable evidence that will transform the clinical management of T2DM through our active collaboration with patients, clinicians, and national medical societies. LEGEND-T2DM will spur scientific innovation through the generation of open-source resources in data science.

## 5.2 Limitations

Even though many potential confounders will be included in these studies, there may be residual bias due to unmeasured or misspecified confounders, such as confounding by indication, differences in physician characteristics that may be associated with drug choice, concomitant use of other drugs started after the index date, and informative censoring at the end of the on-treatment periods. To minimize this risk, we will use methods to detect residual bias through a large number of negative and positive controls.

Ideal negative controls carry identical confounding between exposures and the outcome of interest [120]. The true confounding structure, however, is unknowable. Instead of attempting to find the elusive perfect negative control, we will rely on a large sample of controls that represent a wide range of confounding structures. If a study comparison proves to be unbiased for all negative controls, we can feel confident that it will also be unbiased for the outcome of interest. In our previous studies [22,25,121], using the active comparator, new-user cohort design we will employ here, we have observed minimal residual bias using negative controls. This stands in stark contrast to other designs such as the (nested) case-control that tends to show large residual bias because of incompatible exposure cohorts implied by the design [122].

Observed follow-up times are limited and variable, potentially reducing power to detect differences in effectiveness and safety and, further, misclassification of study variables is unavoidable in secondary use of health data, so it is possible to misclassify treatments, covariates, and outcomes. Based on our previous successful studies on antihypertensives, we do not expect differential misclassification, and therefore bias will most likely



Table 4: IRB approval or waiver statement from partners.

| Data source                                              | Statement                                                                                                                                                                                                                                                                  |
|----------------------------------------------------------|----------------------------------------------------------------------------------------------------------------------------------------------------------------------------------------------------------------------------------------------------------------------------|
| IBM MarketScan Commercial Claims and Encounters (CCAIE)  | New England Institutional Review Board and was determined to be exempt from broad IRB approval, as this research project did not involve human subject research.                                                                                                           |
| IBM MarketScan Medicare Supplemental Database (MDCR)     | New England Institutional Review Board and was determined to be exempt from broad IRB approval, as this research project did not involve human subject research.                                                                                                           |
| IBM MarketScan Multi-State Medicaid Database (MDCD)      | New England Institutional Review Board and was determined to be exempt from broad IRB approval, as this research project did not involve human subject research.                                                                                                           |
| IQVIA Open Claims (IOC)                                  | This is a retrospective database study on de-identified data and is deemed not human subject research. Approval is provided for OHDSI network studies.                                                                                                                     |
| Japan Medical Data Center (JMDC)                         | New England Institutional Review Board and was determined to be exempt from broad IRB approval, as this research project did not involve human subject research.                                                                                                           |
| Korea National Health Insurance Service (NHIS)           | Ajou University Institutional Review Board (AJIRB-MED-EXP-17-054 for LEGEND-HTN) and approval expected shortly for LEGEND-T2DM.                                                                                                                                            |
| Optum Clinformatics Data Mart (Optum)                    | New England Institutional Review Board and was determined to be exempt from broad IRB approval, as this research project did not involve human subject research.                                                                                                           |
| Columbia University Irving Medical Center (CIUMC)        | Use of the CIUMC data source was approved by the Columbia University Institutional Review Board as an OHDSI network study (IRB\# AAAO7805).                                                                                                                                |
| Department of Veterans Affairs (VA)                      | Use of the VA-OMOP data source was reviewed by the Department of Veterans Affairs Central Institutional Review Board (IRB) and was determined to meet the criteria for exemption under Exemption Category 4(3) and approved the request for Waiver of HIPAA Authorization. |
| Information System for Research in Primary Care (SIDIAP) | Use of the SIDIAP data source was approved by the Clinical Research Ethics Committee of IDIAPJGol (project code: 20/070-PCV)                                                                                                                                               |
| IQVIA Disease Analyzer Germany (DAG)                     | This is a retrospective database study on de-identified data and is deemed not human subject research. Approval is provided for OHDSI network studies.                                                                                                                     |
| Optum Electronic Health Records (OptumEHR)               | New England Institutional Review Board and was determined to be exempt from broad IRB approval, as this research project did not involve human subject research.                                                                                                           |
| Yale New Haven Health System (YNHHS)                     | Use of the YNHHS EHR data source was approved by the Yale University Institutional Review Board as an OHDSI network study (IRB\# pending).                                                                                                                                 |

be towards the null. Finally, the electronic health record databases may be missing care episodes for patients due to care outside the respective health systems. Such bias, however, will also most likely be towards the null.

## 6 Protection of Human Subjects

LEGEND-T2DM does not involve human subjects research. The project does, however, use human data collected during routine healthcare provision. Most often the data are de-identified within data source. All data partners executing the LEGEND-T2DM studies within their data sources will have received institutional review board (IRB) approval or waiver for participation in accordance to their institutional governance prior to execution (see Table 4). LEGEND-T2DM executes across a federated and distributed data network, where analysis code is sent to participating data partners and only aggregate summary statistics are returned, with no sharing of patient-level data between organizations.



---

## 7 Management and Reporting of Adverse Events and Adverse Reactions

LEGEND-T2DM uses coded data that already exist in electronic databases. In these types of databases, it is not usually possible to link (i.e., identify a potential causal association between) a particular product and medical event for any specific individual. Thus, the minimum criteria for reporting an adverse event (i.e., identifiable patient, identifiable reporter, a suspect product and event) are not available and adverse events are not reportable as individual adverse event reports. The study results will be assessed for medically important findings.

## 8 Plans for Disseminating and Communicating Study Results

Open science aims to make scientific research, including its data process and software, and its dissemination, through publication and presentation, accessible to all levels of an inquiring society, amateur or professional [123] and is a governing principle of LEGEND-T2DM. Open science delivers reproducible, transparent and reliable evidence. All aspects of LEGEND-T2DM (except private patient data) will be open and we will actively encourage other interested researchers, clinicians and patients to participate. This differs fundamentally from traditional studies that rarely open their analytic tools or share all result artifacts, and inform the community about hard-to-verify conclusions at completion.

### 8.1 Transparent and re-usable research tools

We will publicly register this protocol and announce its availability for feedback from stakeholders, the OHDSI community and within clinical professional societies. This protocol will link to open source code for all steps to generating diagnostics, effect estimates, figures and tables. Such transparency is possible because we will construct our studies on top of the OHDSI toolstack of open source software tools that are community developed and rigorously tested [25]. We will publicly host LEGEND-T2DM source code at (<https://github.com/ohdsi-studies/LegendT2dm>), allowing public contribution and review, and free re-use for anyone's future research.

### 8.2 Continuous sharing of results

LEGEND-T2DM embodies a new approach to generating evidence from healthcare data that overcome weaknesses in the current process of answering and publishing (or not) one

question at a time. Generating evidence for thousands of research and control questions using a systematic process enables us to not only evaluate that process and the coherence and consistency of the evidence, but also to avoid *p*-hacking and publication bias [35]. We will store and openly communicate all of these results as they become available using a user-friendly web-based app that serves up all descriptive statistics, study diagnostics and effect estimates for each cohort comparison and outcome. Open access to this app will be through a general public facing LEGEND-T2DM webpage.

### 8.3 Scientific meetings and publications

We will deliver multiple presentations annually at scientific venues including the annual meetings of the American Diabetes Association, American College of Cardiology, American Heart Association and American Medical Informatics Association. We will also prepare multiple scientific publications for clinical, informatics and statistical journals.

### 8.4 General public

We believe in sharing our findings that will guide clinical care with the general public. LEGEND-T2DM will use social-media (Twitter) to facilitate this. With dedicated support from the OHDSI communications specialist, we will deliver regular press releases at key project stages, distributed via the extensive media networks of UCLA, Columbia and Yale.

## References

- 1 Lo C, Toyama T, Wang Y *et al*. Insulin and glucose-lowering agents for treating people with diabetes and chronic kidney disease. *Cochrane database of systematic reviews* 2018.
- 2 North EJ, Newman JD. Review of cardiovascular outcomes trials of sodium-glucose cotransporter-2 inhibitors and glucagon-like peptide-1 receptor agonists. *Current opinion in cardiology* 2019;**34**:687–92.
- 3 Zinman B, Wanner C, Lachin JM *et al*. Empagliflozin, cardiovascular outcomes, and mortality in type 2 diabetes. *The New England journal of medicine* 2015;**373**:2117–28.
- 4 Neal B, Perkovic V, Mahaffey KW *et al*. Canagliflozin and cardiovascular and renal events in type 2 diabetes. *The New England journal of medicine* 2017;**377**:644–57.
- 5 Marso SP, Daniels GH, Brown-Frandsen K *et al*. Liraglutide and cardiovascular outcomes in type 2 diabetes. *The New England journal of medicine* 2016;**375**:311–22.

- 6 Marso SP, Bain SC, Consoli A *et al.* Semaglutide and cardiovascular outcomes in patients with type 2 diabetes. *The New England journal of medicine* 2016;**375**:1834–44.
- 7 Scirica BM, Bhatt DL, Braunwald E *et al.* Saxagliptin and cardiovascular outcomes in patients with type 2 diabetes mellitus. *The New England journal of medicine* 2013;**369**:1317–26.
- 8 White WB, Cannon CP, Heller SR *et al.* Alogliptin after acute coronary syndrome in patients with type 2 diabetes. *The New England journal of medicine* 2013;**369**:1327–35.
- 9 Green JB, Bethel MA, Armstrong PW *et al.* Effect of sitagliptin on cardiovascular outcomes in type 2 diabetes. *The New England journal of medicine* 2015;**373**:232–42.
- 10 Rosenstock J, Kahn SE, Johansen OE *et al.* Effect of linagliptin vs glimepiride on major adverse cardiovascular outcomes in patients with type 2 diabetes: The CAROLINA randomized clinical trial. *JAMA: the journal of the American Medical Association* 2019.
- 11 Cefalu WT, Kaul S, Gerstein HC *et al.* Cardiovascular outcomes trials in type 2 diabetes: Where do we go from here? Reflections from aDiabetes CareEditors' expert forum. *Diabetes Care*. 2018;**41**:14–31.
- 12 Palmer SC, Tendal B, Mustafa RA *et al.* Sodium-glucose cotransporter protein-2 (SGLT-2) inhibitors and glucagon-like peptide-1 (GLP-1) receptor agonists for type 2 diabetes: Systematic review and network meta-analysis of randomised controlled trials. *BMJ* 2021;**372**:m4573.
- 13 Qiu M, Ding L-L, Wei X-B *et al.* Comparative efficacy of glucagon-like peptide 1 receptor agonists and sodium glucose cotransporter 2 inhibitors for prevention of major adverse cardiovascular events in type 2 diabetes: A network meta-analysis. *Journal of cardiovascular pharmacology* 2021;**77**:34–7.
- 14 Yamada T, Wakabayashi M, Bhalla A *et al.* Cardiovascular and renal outcomes with SGLT-2 inhibitors versus GLP-1 receptor agonists in patients with type 2 diabetes mellitus and chronic kidney disease: A systematic review and network meta-analysis. *Cardiovascular diabetology* 2021;**20**:14.
- 15 Puhan MA, Schünemann HJ, Murad MH *et al.* A GRADE working group approach for rating the quality of treatment effect estimates from network meta-analysis. *BMJ* 2014;**349**:g5630.
- 16 Brignardello-Petersen R, Izcovich A, Rochweg B *et al.* GRADE approach to drawing conclusions from a network meta-analysis using a partially contextualised framework. *BMJ* 2020;**371**:m3907.
- 17 McCoy RG, Dykhoff HJ, Sangaralingham L *et al.* Adoption of new Glucose-Lowering medications in the U.S.-The case of SGLT2 inhibitors: Nationwide cohort study. *Diabetes technology & therapeutics* 2019;**21**:702–12.
- 18 Curtis HJ, Dennis JM, Shields BM *et al.* Time trends and geographical variation in prescribing of drugs for diabetes in england from 1998 to 2017. *Diabetes, obesity &*

*metabolism* 2018;**20**:2159–68.

19 Arnold SV, Inzucchi SE, Tang F *et al.* Real-world use and modeled impact of glucose-lowering therapies evaluated in recent cardiovascular outcomes trials: An NCDR research to practice project. *European journal of preventive cardiology* 2017;**24**:1637–45.

20 Dave CV, Schneeweiss S, Wexler DJ *et al.* Trends in clinical characteristics and prescribing preferences for SGLT2 inhibitors and GLP-1 receptor agonists, 2013–2018. *Diabetes care* 2020;**43**:921–4.

21 Le P, Chaitoff A, Misra-Hebert AD *et al.* Use of antihyperglycemic medications in U.S. Adults: An analysis of the national health and nutrition examination survey. *Diabetes care* 2020;**43**:1227–33.

22 Suchard MA, Schuemie MJ, Krumholz HM *et al.* Comprehensive comparative effectiveness and safety of first-line antihypertensive drug classes: A systematic, multinational, large-scale analysis. *The Lancet* 2019;**394**:1816–26.

23 Yoshida K, Solomon DH, Kim SC. Active-comparator design and new-user design in observational studies. *Nature reviews Rheumatology* 2015;**11**:437–41.

24 Ryan PB, Schuemie MJ, Gruber S *et al.* Empirical performance of a new user cohort method: Lessons for developing a risk identification and analysis system. *Drug safety: an international journal of medical toxicology and drug experience* 2013;**36 Suppl 1**:S59–72.

25 Schuemie MJ, Cepeda MS, Suchard MA *et al.* How confident are we about observational findings in health care: A benchmark study. *Harvard Data Science Review* 2020;**2**.

26 Schneeweiss S. A basic study design for expedited safety signal evaluation based on electronic healthcare data. *Pharmacoepidemiology and drug safety* 2010;**19**:858–68.

27 Gagne JJ, Fireman B, Ryan PB *et al.* Design considerations in an active medical product safety monitoring system. *Pharmacoepidemiology and drug safety* 2012;**21 Suppl 1**:32–40.

28 Johnson ES, Bartman BA, Briesacher BA *et al.* The incident user design in comparative effectiveness research. *Pharmacoepidemiology and drug safety* 2013;**22**:1–6.

29 Schneeweiss S, Patrick AR, Stürmer T *et al.* Increasing levels of restriction in pharmacoepidemiologic database studies of elderly and comparison with randomized trial results. *Medical care* 2007;**45**:S131–42.

30 Suissa S, Moodie EEM, Dell’Aniello S. Prevalent new-user cohort designs for comparative drug effect studies by time-conditional propensity scores. *Pharmacoepidemiology and Drug Safety*. 2017;**26**:459–68.

31 Tian Y, Schuemie MJ, Suchard MA. Evaluating large-scale propensity score performance through real-world and synthetic data experiments. *International journal of epidemiology* 2018;**47**:2005–14.

32 Schuemie MJ, Ryan PB, DuMouchel W *et al.* Interpreting observational studies: Why empirical calibration is needed to correct p-values. *Statistics in Medicine* 2014;**33**:209–18.





- 33 Schuemie MJ, Hripcsak G, Ryan PB *et al.* Robust empirical calibration of p -values using observational data. *Statistics in Medicine*. 2016;**35**:3883–8.
- 34 Schuemie MJ, Hripcsak G, Ryan PB *et al.* Empirical confidence interval calibration for population-level effect estimation studies in observational healthcare data. *Proceedings of the National Academy of Sciences of the United States of America* 2018;**115**:2571–7.
- 35 Schuemie MJ, Ryan PB, Hripcsak G *et al.* Improving reproducibility by using high-throughput observational studies with empirical calibration. *Philosophical transactions Series A, Mathematical, physical, and engineering sciences* 2018;**376**.
- 36 Graham DJ, Ouellet-Hellstrom R, MaCurdy TE *et al.* Risk of acute myocardial infarction, stroke, heart failure, and death in elderly medicare patients treated with rosiglitazone or pioglitazone. *JAMA: the journal of the American Medical Association* 2010;**304**:411–8.
- 37 Turner RM, Kwok CS, Chen-Turner C *et al.* Thiazolidinediones and associated risk of bladder cancer: A systematic review and meta-analysis. *British journal of clinical pharmacology* 2014;**78**:258–73.
- 38 Hernán MA, Robins JM. Using big data to emulate a target trial when a randomized trial is not available. *American Journal of Epidemiology* 2016;**183**:758–64.
- 39 Hernán, Miguel. Antihyperglycemic therapy and cardiovascular risk: Design and emulation of a target trial using healthcare databases. Patient-Centered Outcomes Research Institute 2019.
- 40 American Diabetes Association. 8. Pharmacologic approaches to glycemic treatment: Standards of medical care in diabetes-2018. *Diabetes care* 2018;**41**:S73–85.
- 41 Nathan DM, Buse JB, Kahn SE *et al.* Rationale and design of the glycemia reduction approaches in diabetes: A comparative effectiveness study (GRADE). *Diabetes care* 2013;**36**:2254–61.
- 42 Association AD, American Diabetes Association. 9. Pharmacologic approaches to glycemic treatment: Standards of medical care in diabetes—2020. *Diabetes Care*. 2020;**43**:S98–S110.
- 43 Schuemie MJ, Ryan PB, Pratt N *et al.* Large-Scale evidence generation and evaluation across a network of databases (LEGEND): Assessing validity using hypertension as a case study. *Journal of the American Medical Informatics Association*; **ocaa124**.
- 44 Ryan PB, Buse JB, Schuemie MJ *et al.* Comparative effectiveness of canagliflozin, SGLT2 inhibitors and non-SGLT2 inhibitors on the risk of hospitalization for heart failure and amputation in patients with type 2 diabetes mellitus: A real-world meta-analysis of 4 observational databases (OBSERVE-4D). *Diabetes, obesity & metabolism* 2018;**20**:2585–2597. doi: 10.1111/dom.13424. Epub 2018 Jun 25.
- 45 You SC, Rho Y, Bikdeli B *et al.* Association of ticagrelor versus clopidogrel with net adverse clinical events in patients with acute coronary syndrome undergoing percutaneous

coronary intervention in clinical practice. *Journal of the American Medical Association*;in press.

46 Wang Y, Desai M, Ryan PB *et al.* Incidence of diabetic ketoacidosis among patients with type 2 diabetes mellitus treated with SGLT2 inhibitors and other antihyperglycemic agents. *Diabetes research and clinical practice* 2017;**128**:83–90.

47 Weinstein RB, Ryan PB, Berlin JA *et al.* Channeling bias in the analysis of risk of myocardial infarction, stroke, gastrointestinal bleeding, and acute renal failure with the use of paracetamol compared with ibuprofen. *Drug safety: an international journal of medical toxicology and drug experience* 2020.

48 Yuan Z, DeFalco FJ, Ryan PB *et al.* Risk of lower extremity amputations in people with type 2 diabetes mellitus treated with sodium-glucose co-transporter-2 inhibitors in the USA: A retrospective cohort study. *Diabetes, obesity & metabolism* 2018;**20**:582–9.

49 Ammann EM, Schweizer ML, Robinson JG *et al.* Chart validation of inpatient ICD-9-CM administrative diagnosis codes for acute myocardial infarction (AMI) among intravenous immune globulin (IGIV) users in the sentinel distributed database. *Pharmacoepidemiology and drug safety* 2018;**27**:398–404. doi: 10.1002/pds.4398. Epub 2018 Feb 15.

50 Floyd JS, Blondon M, Moore KP *et al.* Validation of methods for assessing cardiovascular disease using electronic health data in a cohort of veterans with diabetes. *Pharmacoepidemiology and drug safety* 2016;**25**:467–71. doi: 10.1002/pds.3921. Epub 2015 Nov 11.

51 Rubbo B, Fitzpatrick NK, Denaxas S *et al.* Use of electronic health records to ascertain, validate and phenotype acute myocardial infarction: A systematic review and recommendations. *International journal of cardiology* 2015;**187**:705-11.:10.1016/j.ijcard.2015.03.075. Epub 2015 Mar 5.

52 Singh S, Fouayzi H, Anzuoni K *et al.* Diagnostic algorithms for cardiovascular death in administrative claims databases: A systematic review. *Drug safety: an international journal of medical toxicology and drug experience* 2018;**23**:018–0754.

53 Wahl PM, Rodgers K, Schneeweiss S *et al.* Validation of claims-based diagnostic and procedure codes for cardiovascular and gastrointestinal serious adverse events in a commercially-insured population. *Pharmacoepidemiology and drug safety* 2010;**19**:596–603. doi: 10.1002/pds.1924.

54 Normand SL, Morris CN, Fung KS *et al.* Development and validation of a claims based index for adjusting for risk of mortality: The case of acute myocardial infarction. *Journal of clinical epidemiology* 1995;**48**:229–43.

55 Andrade SE, Harrold LR, Tjia J *et al.* A systematic review of validated methods for identifying cerebrovascular accident or transient ischemic attack using administrative data. *Pharmacoepidemiology and drug safety* 2012;**21**:100–28. doi: 10.1002/pds.2312.

56 Park TH, Choi JC. Validation of stroke and thrombolytic therapy in korean national health insurance claim data. *Journal of clinical neurology* 2016;**12**:42–8. doi:

10.3988/jcn.2016.12.1.42. Epub 2015 Sep 11.

57 Gon Y, Kabata D, Yamamoto K *et al.* Validation of an algorithm that determines stroke diagnostic code accuracy in a Japanese hospital-based cancer registry using electronic medical records. *BMC medical informatics and decision making* 2017;**17**:157. doi: 10.1186/s12911-017-0554-x.

58 Sung SF, Hsieh CY, Lin HJ *et al.* Validation of algorithms to identify stroke risk factors in patients with acute ischemic stroke, transient ischemic attack, or intracerebral hemorrhage in an administrative claims database. *International journal of cardiology* 2016;**215**:277-82. doi: 10.1016/j.ijcard.2016.04.069. Epub 2016 Apr 14.

59 Tu K, Wang M, Young J *et al.* Validity of administrative data for identifying patients who have had a stroke or transient ischemic attack using EMERALD as a reference standard. *The Canadian journal of cardiology* 2013;**29**:1388-94. doi: 10.1016/j.cjca.2013.07.676. Epub 2013 Sep 26.

60 Yuan Z, Voss EA, DeFalco FJ *et al.* Risk prediction for ischemic stroke and transient ischemic attack in patients without atrial fibrillation: A retrospective cohort study. *Journal of stroke and cerebrovascular diseases: the official journal of National Stroke Association* 2017;**26**:1721-1731. doi: 10.1016/j.jstrokecerebrovasdis.2017.03.036. Epub 2017 Apr 6.

61 Hennessy S, Leonard CE, Freeman CP *et al.* Validation of diagnostic codes for outpatient-originating sudden cardiac death and ventricular arrhythmia in Medicaid and Medicare claims data. *Pharmacoepidemiology and drug safety* 2010;**19**:555-62. doi: 10.1002/pds.1869.

62 Kaspar M, Fette G, Guder G *et al.* Underestimated prevalence of heart failure in hospital inpatients: A comparison of ICD codes and discharge letter information. *Clinical research in cardiology: official journal of the German Cardiac Society* 2018;**107**:778-787. doi: 10.1007/s00392-018-1245-z. Epub 2018 Apr 17.

63 Feder SL, Redeker NS, Jeon S *et al.* Validation of the ICD-9 diagnostic code for palliative care in patients hospitalized with heart failure within the Veterans Health Administration. *The American journal of hospice & palliative care* 2018;**35**:959-965. doi: 10.1177/1049909117747519. Epub 2017 Dec 18.

64 Rosenman M, He J, Martin J *et al.* Database queries for hospitalizations for acute congestive heart failure: Flexible methods and validation based on set theory. *Journal of the American Medical Informatics Association: JAMIA* 2014;**21**:345-52. doi: 10.1136/amiainl-2013-001942. Epub 2013 Oct 10.

65 Voors AA, Ouwerkerk W, Zannad F *et al.* Development and validation of multivariable models to predict mortality and hospitalization in patients with heart failure. *European journal of heart failure* 2017;**19**:627-634. doi: 10.1002/ejhf.785. Epub 2017 Mar 1.

66 Floyd JS, Wellman R, Fuller S *et al.* Use of electronic health data to estimate heart failure events in a Population-Based cohort with CKD. *Clinical journal of the American*

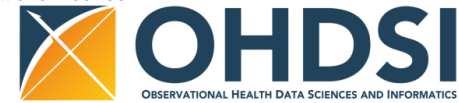

*Society of Nephrology: CJASN* 2016;**11**:1954–1961. doi: 10.2215/CJN.03900416. Epub 2016 Aug 9.

67 Gini R, Schuemie MJ, Mazzaglia G *et al*. Automatic identification of type 2 diabetes, hypertension, ischaemic heart disease, heart failure and their levels of severity from Italian general practitioners' electronic medical records: A validation study. *BMJ open* 2016;**6**:e012413. doi: 10.1136/bmjopen-2016-012413.

68 Afzal Z, Schuemie MJ, Blijderveen JC van *et al*. Improving sensitivity of machine learning methods for automated case identification from free-text electronic medical records. *BMC medical informatics and decision making* 2013;**13**:30. doi: 10.1186/1472-6947-13-30.

69 Lenihan CR, Montez-Rath ME, Mora Mangano CT *et al*. Trends in acute kidney injury, associated use of dialysis, and mortality after cardiac surgery, 1999 to 2008. *The Annals of thoracic surgery* 2013;**95**:20–8. doi: 10.1016/j.athoracsur.2012.05.131. Epub 2012 Dec 25.

70 Winkelmayer WC, Schneeweiss S, Mogun H *et al*. Identification of individuals with CKD from Medicare claims data: A validation study. *American journal of kidney diseases: the official journal of the National Kidney Foundation* 2005;**46**:225–32. doi: 10.1053/j.ajkd.2005.04.029.

71 Grams ME, Waikar SS, MacMahon B *et al*. Performance and limitations of administrative data in the identification of AKI. *Clinical journal of the American Society of Nephrology: CJASN* 2014;**9**:682–9. doi: 10.2215/CJN.07650713. Epub 2014 Jan 23.

72 Arnold J, Ng KP, Sims D *et al*. Incidence and impact on outcomes of acute kidney injury after a stroke: A systematic review and meta-analysis. *BMC nephrology* 2018;**19**:283. doi: 10.1186/s12882-018-1085-0.

73 Sutherland SM, Byrnes JJ, Kothari M *et al*. AKI in hospitalized children: Comparing the pRIFLE, AKIN, and KDIGO definitions. *Clinical journal of the American Society of Nephrology: CJASN* 2015;**10**:554–61. doi: 10.2215/CJN.01900214. Epub 2015 Feb 3.

74 Waikar SS, Wald R, Chertow GM *et al*. Validity of international classification of diseases, ninth revision, clinical modification codes for acute renal failure. *Journal of the American Society of Nephrology: JASN* 2006;**17**:1688–94. doi: 10.1681/ASN.2006010073. Epub 2006 Apr 26.

75 Rhee C, Murphy MV, Li L *et al*. Improving documentation and coding for acute organ dysfunction biases estimates of changing sepsis severity and burden: A retrospective study. *Critical care / the Society of Critical Care Medicine* 2015;**19**:338. doi: 10.1186/s13054-015-1048-9.

76 Vashisht R, Jung K, Schuler A *et al*. Association of hemoglobin A1c levels with use of sulfonylureas, dipeptidyl peptidase 4 inhibitors, and thiazolidinediones in patients with type 2 diabetes treated with metformin: Analysis from the observational health data sciences and informatics initiative. *JAMA network open* 2018;**1**:e181755–5.

- 77 Broder MS, Chang E, Cherepanov D *et al.* Identification of potential markers for cushing disease. *Endocrine practice: official journal of the American College of Endocrinology and the American Association of Clinical Endocrinologists* 2016;**22**:567–74. doi: 10.4158/EP15914.OR. Epub 2016 Jan 20.
- 78 Williams BA. The clinical epidemiology of fatigue in newly diagnosed heart failure. *BMC cardiovascular disorders* 2017;**17**:122. doi: 10.1186/s12872-017-0555-9.
- 79 Yabe D, Kuwata H, Kaneko M *et al.* Use of the japanese health insurance claims database to assess the risk of acute pancreatitis in patients with diabetes: Comparison of DPP-4 inhibitors with other oral antidiabetic drugs. *Diabetes, obesity & metabolism* 2015;**17**:430–4. doi: 10.1111/dom.12381. Epub 2014 Sep 17.
- 80 Dore DD, Hussein M, Hoffman C *et al.* A pooled analysis of exenatide use and risk of acute pancreatitis. *Current medical research and opinion* 2013;**29**:1577–86. doi: 10.1185/03007995.2013.838550. Epub 2013 Sep 13.
- 81 Dore DD, Chaudhry S, Hoffman C *et al.* Stratum-specific positive predictive values of claims for acute pancreatitis among commercial health insurance plan enrollees with diabetes mellitus. *Pharmacoepidemiology and drug safety* 2011;**20**:209–13. doi: 10.1002/pds.2077. Epub 2010 Dec 23.
- 82 Chen HJ, Wang JJ, Tsay WI *et al.* Epidemiology and outcome of acute pancreatitis in end-stage renal disease dialysis patients: A 10-year national cohort study. *Nephrology, dialysis, transplantation: official publication of the European Dialysis and Transplant Association - European Renal Association* 2017;**32**:1731–1736. doi: 10.1093/ndt/gfw400.
- 83 Ooba N, Setoguchi S, Ando T *et al.* Claims-based definition of death in japanese claims database: Validity and implications. *PLoS One* 2013;**8**:e66116. doi: 10.1371/journal.pone.0066116. Print 2013.
- 84 Robinson TE, Elley CR, Kenealy T *et al.* Development and validation of a predictive risk model for all-cause mortality in type 2 diabetes. *Diabetes Res Clin Pract* 2015;**108**:482–8. doi: 10.1016/j.diabres.2015.02.015. Epub 2015 Mar 16.
- 85 Wang L, Voss EA, Weaver J *et al.* Diabetic ketoacidosis in patients with type 2 diabetes treated with sodium glucose co-transporter 2 inhibitors versus other antihyperglycemic agents: An observational study of four us administrative claims databases. *Pharmacoepidemiology and Drug Safety* 2019;**28**:1620–8.
- 86 Buono JL, Mathur K, Averitt AJ *et al.* Economic burden of irritable bowel syndrome with diarrhea: Retrospective analysis of a U.S. Commercially insured population. *J Manag Care Spec Pharm* 2017;**23**:453–460. doi: 10.18553/jmcp.2016.16138. Epub 2016 Nov 21.
- 87 Krishnarajah G, Duh MS, Korves C *et al.* Public health impact of complete and incomplete rotavirus vaccination among commercially and medicaid insured children in the united states. *PloS one* 2016;**11**:e0145977. doi: 10.1371/journal.pone.0145977. eCollection 2016.

- 88 Panozzo CA, Becker-Dreps S, Pate V *et al*. Direct, indirect, total, and overall effectiveness of the rotavirus vaccines for the prevention of gastroenteritis hospitalizations in privately insured US children, 2007-2010. *American Journal of Epidemiology* 2014;**179**:895–909. doi: 10.1093/aje/kwu001. Epub 2014 Feb 26.
- 89 Nichols GA, Brodovicz KG, Kimes TM *et al*. Prevalence and incidence of urinary tract and genital infections among patients with and without type 2 diabetes. *Journal of diabetes and its complications* 2017;**31**:1587–91.
- 90 Abbas S, Ihle P, Harder S *et al*. Risk of hyperkalemia and combined use of spironolactone and long-term ACE inhibitor/angiotensin receptor blocker therapy in heart failure using real-life data: A population- and insurance-based cohort. *Pharmacoepidemiol Drug Saf* 2015;**24**:406–13. doi: 10.1002/pds.3748. Epub 2015 Feb 12.
- 91 Betts KA, Woolley JM, Mu F *et al*. The prevalence of hyperkalemia in the united states. *Curr Med Res Opin* 2018;**34**:971–978. doi: 10.1080/03007995.2018.1433141. Epub 2018 Feb 21.
- 92 Fitch K, Woolley JM, Engel T *et al*. The clinical and economic burden of hyperkalemia on medicare and commercial payers. *Am Health Drug Benefits* 2017;**10**:202–210.
- 93 Leonard CE, Han X, Brensinger CM *et al*. Comparative risk of serious hypoglycemia with oral antidiabetic monotherapy: A retrospective cohort study. *Pharmacoepidemiology and Drug Safety* 2018;**27**:9–18.
- 94 Chrischilles E, Rubenstein L, Chao J *et al*. Initiation of nonselective alpha1-antagonist therapy and occurrence of hypotension-related adverse events among men with benign prostatic hyperplasia: A retrospective cohort study. *Clinical therapeutics* 2001;**23**:727–43.
- 95 Goldstein JL, Zhao SZ, Burke TA *et al*. Incidence of outpatient physician claims for upper gastrointestinal symptoms among new users of celecoxib, ibuprofen, and naproxen in an insured population in the united states. *The American journal of gastroenterology* 2003;**98**:2627–34. doi: 10.1111/j.1572-0241.2003.08722.x.
- 96 Donga PZ, Bilir SP, Little G *et al*. Comparative treatment-related adverse event cost burden in immune thrombocytopenic purpura. *Journal of medical economics* 2017;**20**:1200–1206. doi: 10.1080/13696998.2017.1370425. Epub 2017 Sep 8.
- 97 Marrett E, Kwong WJ, Frech F *et al*. Health care utilization and costs associated with nausea and vomiting in patients receiving oral Immediate-Release opioids for outpatient acute pain management. *Pain Ther* 2016;**5**:215–226. doi: 10.1007/s40122-016-0057-y. Epub 2016 Oct 4.
- 98 Tamariz L, Harkins T, Nair V. A systematic review of validated methods for identifying venous thromboembolism using administrative and claims data. *Pharmacoepidemiol Drug Saf* 2012;**21**:154–62. doi: 10.1002/pds.2341.
- 99 Burwen DR, Wu C, Cirillo D *et al*. Venous thromboembolism incidence, recurrence, and mortality based on women’s health initiative data and medicare claims. *Thromb Res* 2017;**150**:78–85. doi: 10.1016/j.thromres.2016.11.015. Epub 2016 Nov 15.

- 100 Coleman CI, Peacock WF, Fermann GJ *et al.* External validation of a multivariable claims-based rule for predicting in-hospital mortality and 30-day post-pulmonary embolism complications. *BMC Health Serv Res* 2016;**16**:610. doi: 10.1186/s12913-016-1855-y.
- 101 Ammann EM, Cuker A, Carnahan RM *et al.* Chart validation of inpatient international classification of diseases, ninth revision, clinical modification (ICD-9-CM) administrative diagnosis codes for venous thromboembolism (VTE) among intravenous immune globulin (IGIV) users in the sentinel distributed database. *Medicine* 2018;**97**:e9960. doi: 10.1097/MD.0000000000009960.
- 102 Rosenbaum PR, Rubin DB. The central role of the propensity score in observational studies for causal effects. *Biometrika* 1983;**70**:41–55.
- 103 Schneeweiss S, Rassen JA, Glynn RJ *et al.* High-dimensional propensity score adjustment in studies of treatment effects using health care claims data. *Epidemiology* 2009;**20**:512.
- 104 Hernán MA, Hernández-Díaz S. Beyond the intention-to-treat in comparative effectiveness research. *Clinical trials* 2012;**9**:48–55.
- 105 Murray EJ, Caniglia EC, Swanson SA *et al.* Patients and investigators prefer measures of absolute risk in subgroups for pragmatic randomized trials. *Journal of Clinical Epidemiology* 2018;**103**:10–21.
- 106 Hernán MA, Robins JM. Per-Protocol analyses of pragmatic trials. *The New England journal of medicine* 2017;**377**:1391–8.
- 107 DerSimonian R, Laird N. Meta-analysis in clinical trials. *Controlled clinical trials* 1986;**7**:177–88.
- 108 Gronsbell J, Hong C, Nie L *et al.* Exact inference for the random-effect model for meta-analyses with rare events. *Statistics in Medicine* 2020;**39**:252–64.
- 109 Higgins JPT, Thompson SG, Spiegelhalter DJ. A re-evaluation of random-effects meta-analysis. *Journal of the Royal Statistical Society Series A*, 2009;**172**:137–59.
- 110 Schuemie MJ, Chen Y, Madigan D *et al.* Combining cox regressions across a heterogeneous distributed research network facing small and zero counts. 2021.<http://arxiv.org/abs/2101.01551>
- 111 Varin C, Reid N, Firth D. An overview of composite likelihood methods. *Statistica Sinica* 2011.
- 112 Voss EA, Boyce RD, Ryan PB *et al.* Accuracy of an automated knowledge base for identifying drug adverse reactions. *Journal of Biomedical Informatics* 2017;**66**:72–81.
- 113 Dukes O, Martinussen T, Tchetgen Tchetgen EJ *et al.* On doubly robust estimation of the hazard difference. *Biometrics* 2019;**75**:100–9.
- 114 Funk MJ, Westreich D, Wiesen C *et al.* Doubly robust estimation of causal effects. *American Journal of Epidemiology* 2011;**173**:761–7.



- 115 Martinussen T, Vansteelandt S, Gerster M *et al.* Estimation of direct effects for survival data by using the aalen additive hazards model. *Journal of the Royal Statistical Society: Series B (Statistical Methodology)* 2011;**73**:773–88.
- 116 Aalen OO. A linear regression model for the analysis of life times. *Statistics in Medicine* 1989;**8**:907–25.
- 117 Wang Y, Lee M, Liu P *et al.* Doubly robust additive hazards models to estimate effects of a continuous exposure on survival. *Epidemiology (Cambridge, Mass)* 2017;**28**:771.
- 118 Austin PC. Balance diagnostics for comparing the distribution of baseline covariates between treatment groups in propensity-score matched samples. *Statistics in Medicine* 2009;**28**:3083–107.
- 119 Schuemie MJ, Ryan PB, Pratt N *et al.* Large-Scale evidence generation and evaluation across a network of databases (LEGEND): Principles and methods. *Journal of the American Medical Informatics Association*; **ocaa103**.
- 120 Lipsitch M, Tchetgen Tchetgen E, Cohen T. Negative controls: A tool for detecting confounding and bias in observational studies. *Epidemiology* 2010;**21**:383–8.
- 121 Hripcsak G, Suchard MA, Shea S *et al.* Comparison of cardiovascular and safety outcomes of chlorthalidone vs hydrochlorothiazide to treat hypertension. *JAMA internal medicine* 2020.
- 122 Schuemie MJ, Ryan PB, Man KKC *et al.* A plea to stop using the case-control design in retrospective database studies. *Statistics in Medicine* 2019;**38**:4199–208.
- 123 Woelfle M, Olliaro P, Todd MH. Open science is a research accelerator. *Nature Chemistry* 2011;**3**:745–8.



# Appendix

## A Exposure Cohort Definitions

### A.1 Class-vs-Class Exposure (DPP4 New-User) Cohort / OT1

#### A.1.1 Cohort Entry Events

People with continuous observation of 365 days before event may enter the cohort when observing any of the following:

1. drug exposure of 'DPP4 inhibitors' for the first time in the person's history.

Limit cohort entry events to the earliest event per person.

Restrict entry events to with all of the following criteria:

1. with the following event criteria: who are  $\geq 18$  years old.
2. having at least 1 condition occurrence of 'Type 2 diabetes mellitus', starting anytime on or before cohort entry start date; allow events outside observation period.
3. having no condition occurrences of 'Type 1 diabetes mellitus', starting anytime on or before cohort entry start date; allow events outside observation period.
4. having no condition occurrences of 'Secondary diabetes mellitus', starting anytime on or before cohort entry start date; allow events outside observation period.

#### A.1.2 Additional Inclusion Criteria

- No prior GLP-1 receptor agonist exposure

Entry events having no drug exposures of 'GLP-1 receptor agonists', starting anytime on or before cohort entry start date; allow events outside observation period.

- No prior SGLT-2 inhibitor exposure

Entry events having no drug exposures of 'SGLT2 inhibitors', starting anytime on or before cohort entry start date; allow events outside observation period.

- No prior SU exposure



Entry events having no drug exposures of ‘Sulfonylureas’, starting anytime on or before cohort entry start date; allow events outside observation period.

- No prior other anti-diabetic exposure

Entry events having no drug exposures of ‘Other anti-diabetics’, starting anytime on or before cohort entry start date; allow events outside observation period.

- Prior metformin use

Entry events with any of the following criteria:

1. having at least 1 drug era of ‘Metformin’, starting anytime up to 90 days before cohort entry start date; allow events outside observation period; with era length  $\geq 90$  days.
2. having at least 3 drug exposures of ‘Metformin’, starting anytime on or before cohort entry start date; allow events outside observation period.

- No prior insulin use or combo initiation: Proxy for  $< 30$  days drug era anytime before index and no combination use on index

Entry events with all of the following criteria:

1. having no drug eras of ‘Insulin’, starting anytime up to 30 days before cohort entry start date; allow events outside observation period; with era length  $> 30$  days.
2. having no drug eras of ‘Insulin’, starting between 30 days before and 0 days after cohort entry start date; allow events outside observation period.

### **A.1.3 Cohort Exit**

The cohort end date will be based on a continuous exposure to ‘DPP4 inhibitors’: allowing 30 days between exposures, adding 0 days after exposure ends, and using days supply and exposure end date for exposure duration.

### **A.1.4 Cohort Eras**

Entry events will be combined into cohort eras if they are within 0 days of each other.

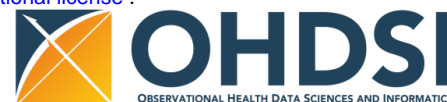

### A.1.5 Concept: DPP4 inhibitors

| Concept ID | Concept Name | Code    | Vocabulary | Excluded | Descendants | Mapped |
|------------|--------------|---------|------------|----------|-------------|--------|
| 43013884   | alogliptin   | 1368001 | RxNorm     | NO       | YES         | NO     |
| 40239216   | linagliptin  | 1100699 | RxNorm     | NO       | YES         | NO     |
| 40166035   | saxagliptin  | 857974  | RxNorm     | NO       | YES         | NO     |
| 1580747    | sitagliptin  | 593411  | RxNorm     | NO       | YES         | NO     |
| 19122137   | vildagliptin | 596554  | RxNorm     | NO       | YES         | NO     |

### A.1.6 Concept: GLP-1 receptor agonists

| Concept ID | Concept Name | Code    | Vocabulary | Excluded | Descendants | Mapped |
|------------|--------------|---------|------------|----------|-------------|--------|
| 44816332   | albiglutide  | 1534763 | RxNorm     | NO       | YES         | NO     |
| 45774435   | dulaglutide  | 1551291 | RxNorm     | NO       | YES         | NO     |
| 1583722    | exenatide    | 60548   | RxNorm     | NO       | YES         | NO     |
| 40170911   | liraglutide  | 475968  | RxNorm     | NO       | YES         | NO     |
| 44506754   | lixisenatide | 1440051 | RxNorm     | NO       | YES         | NO     |
| 793143     | semaglutide  | 1991302 | RxNorm     | NO       | YES         | NO     |

### A.1.7 Concept: SGLT2 inhibitors

| Concept ID | Concept Name  | Code    | Vocabulary | Excluded | Descendants | Mapped |
|------------|---------------|---------|------------|----------|-------------|--------|
| 43526465   | canagliflozin | 1373458 | RxNorm     | NO       | YES         | NO     |
| 44785829   | dapagliflozin | 1488564 | RxNorm     | NO       | YES         | NO     |
| 45774751   | empagliflozin | 1545653 | RxNorm     | NO       | YES         | NO     |
| 793293     | ertugliflozin | 1992672 | RxNorm     | NO       | YES         | NO     |

### A.1.8 Concept: Sulfonylureas

| Concept ID | Concept Name   | Code  | Vocabulary | Excluded | Descendants | Mapped |
|------------|----------------|-------|------------|----------|-------------|--------|
| 1594973    | chlorpropamide | 2404  | RxNorm     | NO       | YES         | NO     |
| 1597756    | glimepiride    | 25789 | RxNorm     | NO       | YES         | NO     |
| 1560171    | glipizide      | 4821  | RxNorm     | NO       | YES         | NO     |
| 19097821   | gliquidone     | 25793 | RxNorm     | NO       | YES         | NO     |
| 1559684    | glyburide      | 4815  | RxNorm     | NO       | YES         | NO     |
| 1502809    | tolazamide     | 10633 | RxNorm     | NO       | YES         | NO     |
| 1502855    | tolbutamide    | 10635 | RxNorm     | NO       | YES         | NO     |

### A.1.9 Concept: Other anti-diabetics

| Concept ID | Concept Name  | Code  | Vocabulary | Excluded | Descendants | Mapped |
|------------|---------------|-------|------------|----------|-------------|--------|
| 1529331    | acarbose      | 16681 | RxNorm     | NO       | YES         | NO     |
| 1530014    | acetohexamide | 173   | RxNorm     | NO       | YES         | NO     |



|          |               |        |        |    |     |    |
|----------|---------------|--------|--------|----|-----|----|
| 730548   | bromocriptine | 1760   | RxNorm | NO | YES | NO |
| 19033498 | carbutamide   | 2068   | RxNorm | NO | YES | NO |
| 19001409 | glibornuride  | 102846 | RxNorm | NO | YES | NO |
| 19059796 | gliclazide    | 4816   | RxNorm | NO | YES | NO |
| 19001441 | glymidine     | 102848 | RxNorm | NO | YES | NO |
| 1510202  | miglitol      | 30009  | RxNorm | NO | YES | NO |
| 1502826  | nateglinide   | 274332 | RxNorm | NO | YES | NO |
| 1525215  | pioglitazone  | 33738  | RxNorm | NO | YES | NO |
| 1516766  | repaglinide   | 73044  | RxNorm | NO | YES | NO |
| 1547504  | rosiglitazone | 84108  | RxNorm | NO | YES | NO |
| 1515249  | troglitazone  | 72610  | RxNorm | NO | YES | NO |

### A.1.10 Concept: Insulin

| Concept ID | Concept Name                                                        | Code    | Vocabulary | Excluded | Descendants | Mapped |
|------------|---------------------------------------------------------------------|---------|------------|----------|-------------|--------|
| 1596977    | insulin, regular, human                                             | 253182  | RxNorm     | NO       | YES         | NO     |
| 1550023    | insulin lispro                                                      | 86009   | RxNorm     | NO       | YES         | NO     |
| 1567198    | insulin aspart, human                                               | 51428   | RxNorm     | NO       | YES         | NO     |
| 1502905    | insulin glargine                                                    | 274783  | RxNorm     | NO       | YES         | NO     |
| 1513876    | insulin lispro protamine, human                                     | 314684  | RxNorm     | NO       | YES         | NO     |
| 1531601    | insulin aspart protamine, human                                     | 352385  | RxNorm     | NO       | YES         | NO     |
| 1586346    | insulin, regular, pork                                              | 221109  | RxNorm     | NO       | YES         | NO     |
| 1544838    | insulin glulisine, human                                            | 400008  | RxNorm     | NO       | YES         | NO     |
| 1516976    | insulin detemir                                                     | 139825  | RxNorm     | NO       | YES         | NO     |
| 1590165    | insulin, regular, beef-pork                                         | 235275  | RxNorm     | NO       | YES         | NO     |
| 1513849    | lente insulin, human                                                | 314683  | RxNorm     | NO       | YES         | NO     |
| 1562586    | lente insulin, pork                                                 | 93108   | RxNorm     | NO       | YES         | NO     |
| 1588986    | insulin human, rDNA origin                                          | 631657  | RxNorm     | NO       | YES         | NO     |
| 1513843    | lente insulin, beef-pork                                            | 314682  | RxNorm     | NO       | YES         | NO     |
| 1586369    | ultralente insulin, human                                           | 221110  | RxNorm     | NO       | YES         | NO     |
| 35605670   | insulin argine                                                      | 1740938 | RxNorm     | NO       | YES         | NO     |
| 35602717   | insulin degludec                                                    | 1670007 | RxNorm     | NO       | YES         | NO     |
| 21600713   | INSULINS AND ANALOGUES                                              | A10A    | ATC        | NO       | YES         | NO     |
| 19078608   | insulin, protamine zinc, beef-pork 100 UNT/ML Injectable Suspension | 311053  | RxNorm     | NO       | YES         | NO     |

### A.1.11 Concept: Metformin

| Concept ID | Concept Name | Code | Vocabulary | Excluded | Descendants | Mapped |
|------------|--------------|------|------------|----------|-------------|--------|
| 1503297    | metformin    | 6809 | RxNorm     | NO       | YES         | NO     |

### A.1.12 Concept: Secondary diabetes mellitus

| Concept ID | Concept Name                | Code    | Vocabulary | Excluded | Descendants | Mapped |
|------------|-----------------------------|---------|------------|----------|-------------|--------|
| 195771     | Secondary diabetes mellitus | 8801005 | SNOMED     | NO       | YES         | NO     |

### A.1.13 Concept: Type 1 diabetes mellitus



| Concept ID | Concept Name                                                    | Code      | Vocabulary | Excluded | Descendants | Mapped |
|------------|-----------------------------------------------------------------|-----------|------------|----------|-------------|--------|
| 201254     | Type 1 diabetes mellitus                                        | 46635009  | SNOMED     | NO       | YES         | NO     |
| 435216     | Disorder due to type 1 diabetes mellitus                        | 420868002 | SNOMED     | NO       | YES         | NO     |
| 200687     | Renal disorder due to type 1 diabetes mellitus                  | 421893009 | SNOMED     | NO       | YES         | NO     |
| 377821     | Disorder of nervous system due to type 1 diabetes mellitus      | 421468001 | SNOMED     | NO       | YES         | NO     |
| 318712     | Peripheral circulatory disorder due to type 1 diabetes mellitus | 421365002 | SNOMED     | NO       | YES         | NO     |

### A.1.14 Concept: Type 2 diabetes mellitus

| Concept ID | Concept Name                                                    | Code      | Vocabulary | Excluded | Descendants | Mapped |
|------------|-----------------------------------------------------------------|-----------|------------|----------|-------------|--------|
| 201826     | Type 2 diabetes mellitus                                        | 44054006  | SNOMED     | NO       | YES         | NO     |
| 443734     | Ketoacidosis due to type 2 diabetes mellitus                    | 421750000 | SNOMED     | NO       | YES         | NO     |
| 443767     | Disorder of eye due to diabetes mellitus                        | 25093002  | SNOMED     | NO       | YES         | NO     |
| 192279     | Disorder of kidney due to diabetes mellitus                     | 127013003 | SNOMED     | NO       | YES         | NO     |
| 443735     | Coma due to diabetes mellitus                                   | 420662003 | SNOMED     | NO       | YES         | NO     |
| 376065     | Disorder of nervous system due to type 2 diabetes mellitus      | 421326000 | SNOMED     | NO       | YES         | NO     |
| 443729     | Peripheral circulatory disorder due to type 2 diabetes mellitus | 422166005 | SNOMED     | NO       | YES         | NO     |
| 443732     | Disorder due to type 2 diabetes mellitus                        | 422014003 | SNOMED     | NO       | YES         | NO     |

## A.2 Metformin Use Modifier

### A.2.1 No prior metformin use

Entry events having no drug eras of 'Metformin', starting anytime on or before cohort entry start date; allow events outside observation period.

## A.3 Escalation Exit Criteria

The cohort end date will be based on a continuous exposure to 'DPP4 inhibitors': allowing 30 days between exposures, adding 0 days after exposure ends, and using days supply and exposure end date for exposure duration.

The person also exists the cohort when encountering any of the following events:

1. drug exposures of 'All alternative target exposures'.
2. drug exposures of 'Other anti-diabetics'.
3. drug eras of 'Insulin', with era length > 30 days.

### A.3.1 Concept: All alternative target exposures

| Concept ID | Concept Name   | Code    | Vocabulary | Excluded | Descendants | Mapped |
|------------|----------------|---------|------------|----------|-------------|--------|
| 44816332   | albiglutide    | 1534763 | RxNorm     | NO       | YES         | NO     |
| 43526465   | canagliflozin  | 1373458 | RxNorm     | NO       | YES         | NO     |
| 1594973    | chlorpropamide | 2404    | RxNorm     | NO       | YES         | NO     |
| 44785829   | dapagliflozin  | 1488564 | RxNorm     | NO       | YES         | NO     |
| 45774435   | dulaglutide    | 1551291 | RxNorm     | NO       | YES         | NO     |
| 45774751   | empagliflozin  | 1545653 | RxNorm     | NO       | YES         | NO     |
| 793293     | ertugliflozin  | 1992672 | RxNorm     | NO       | YES         | NO     |
| 1583722    | exenatide      | 60548   | RxNorm     | NO       | YES         | NO     |
| 1597756    | glimepiride    | 25789   | RxNorm     | NO       | YES         | NO     |
| 1560171    | glipizide      | 4821    | RxNorm     | NO       | YES         | NO     |
| 19097821   | gliquidone     | 25793   | RxNorm     | NO       | YES         | NO     |
| 1559684    | glyburide      | 4815    | RxNorm     | NO       | YES         | NO     |
| 40170911   | liraglutide    | 475968  | RxNorm     | NO       | YES         | NO     |
| 44506754   | lixisenatide   | 1440051 | RxNorm     | NO       | YES         | NO     |
| 793143     | semaglutide    | 1991302 | RxNorm     | NO       | YES         | NO     |
| 1502809    | tolazamide     | 10633   | RxNorm     | NO       | YES         | NO     |
| 1502855    | tolbutamide    | 10635   | RxNorm     | NO       | YES         | NO     |

## A.4 Heterogeneity Study Inclusion Criteria

### A.4.1 Lower age group

Entry events with the following event criteria: who are < 45 years old.

### A.4.2 Middle age group

Entry events with all of the following criteria:

1. with the following event criteria: who are  $\geq$  45 years old.
2. with the following event criteria: who are < 65 years old.

### A.4.3 Older age group

Entry events with the following event criteria: who are  $\geq$  65 years old.

### A.4.4 Female stratum

Entry events with the following event criteria: who are female.

#### **A.4.5 Male stratum**

Entry events with the following event criteria: who are male.

#### **A.4.6 Race stratum**

Entry events with the following event criteria: race is: “black or african american”, “black”, “african american”, “african”, “bahamian”, “barbadian”, “dominican”, “dominica islander”, “haitian”, “jamaican”, “tobagoan”, “trinidadian” or “west indian”.

#### **A.4.7 Low cardiovascular risk**

Entry events with all of the following criteria:

1. having no condition occurrences of ‘Conditions indicating established cardiovascular disease’, starting anytime on or before cohort entry start date; allow events outside observation period.
2. having no procedure occurrences of ‘Procedures indicating established cardiovascular disease’, starting anytime on or before cohort entry start date; allow events outside observation period.

#### **A.4.8 Higher cardiovascular risk**

Entry events with any of the following criteria:

1. having at least 1 condition occurrence of ‘Conditions indicating established cardiovascular disease’, starting anytime on or before cohort entry start date; allow events outside observation period.
2. having at least 1 procedure occurrence of ‘Procedures indicating established cardiovascular disease’, starting anytime on or before cohort entry start date; allow events outside observation period.

#### **A.4.9 Concept: Conditions indicating established cardiovascular disease**

| Concept ID | Concept Name                    | Code      | Vocabulary | Excluded | Descendants | Mapped |
|------------|---------------------------------|-----------|------------|----------|-------------|--------|
| 319844     | Acute ischemic heart disease    | 413439005 | SNOMED     | NO       | YES         | NO     |
| 321318     | Angina pectoris                 | 194828000 | SNOMED     | NO       | YES         | NO     |
| 4124841    | Aortic bifurcation syndrome     | 233972005 | SNOMED     | YES      | YES         | NO     |
| 312337     | Arterial embolus and thrombosis | 266262004 | SNOMED     | NO       | YES         | NO     |

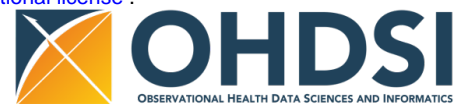

|          |                                                              |                |        |     |     |    |
|----------|--------------------------------------------------------------|----------------|--------|-----|-----|----|
| 4278217  | Arterial thrombosis                                          | 65198009       | SNOMED | NO  | YES | NO |
| 40484167 | Arteriosclerosis of artery of extremity                      | 443971004      | SNOMED | NO  | YES | NO |
| 318443   | Arteriosclerotic vascular disease                            | 72092001       | SNOMED | NO  | YES | NO |
| 314659   | Arteritis                                                    | 52089001       | SNOMED | NO  | NO  | NO |
| 40479625 | Atherosclerosis of artery                                    | 441574008      | SNOMED | NO  | YES | NO |
| 40484541 | Atherosclerosis of autologous vein bypass graft of limb      | 442693003      | SNOMED | YES | YES | NO |
| 312902   | Benign intracranial hypertension                             | 68267002       | SNOMED | YES | YES | NO |
| 4288310  | Carotid artery obstruction                                   | 69798007       | SNOMED | YES | YES | NO |
| 372924   | Cerebral artery occlusion                                    | 20059004       | SNOMED | NO  | YES | NO |
| 376713   | Cerebral hemorrhage                                          | 274100004      | SNOMED | NO  | YES | NO |
| 381591   | Cerebrovascular disease                                      | 62914000       | SNOMED | NO  | YES | NO |
| 316494   | Cerebrovascular disorder in the puerperium                   | 6594005        | SNOMED | YES | YES | NO |
| 315286   | Chronic ischemic heart disease                               | 413838009      | SNOMED | NO  | YES | NO |
| 44782819 | Chronic occlusion of artery of extremity                     | 698816006      | SNOMED | NO  | YES | NO |
| 4313767  | Chronic peripheral venous hypertension                       | 423674003      | SNOMED | YES | YES | NO |
| 372721   | Congenital anomaly of cerebrovascular system                 | 65587001       | SNOMED | YES | YES | NO |
| 316995   | Coronary occlusion                                           | 63739005       | SNOMED | NO  | YES | NO |
| 134057   | Disorder of cardiovascular system                            | 49601007       | SNOMED | NO  | NO  | NO |
| 40480453 | Disorder of vein of lower extremity                          | 441739009      | SNOMED | YES | YES | NO |
| 46272492 | Dissection of artery                                         | 710864009      | SNOMED | YES | YES | NO |
| 4324690  | Fracture of skull                                            | 71642004       | SNOMED | YES | YES | NO |
| 441246   | Hemangioma of intracranial structure                         | 93468003       | SNOMED | YES | YES | NO |
| 380113   | Hemorrhage in optic nerve sheaths                            | 14460007       | SNOMED | YES | YES | NO |
| 192763   | Injury of blood vessel                                       | 57662003       | SNOMED | YES | YES | NO |
| 4275428  | Injury of vein                                               | 64583005       | SNOMED | YES | YES | NO |
| 442774   | Intermittent claudication                                    | 63491006       | SNOMED | NO  | YES | NO |
| 439847   | Intracranial hemorrhage                                      | 1386000        | SNOMED | NO  | YES | NO |
| 434056   | Late effects of cerebrovascular disease                      | 195239002      | SNOMED | NO  | YES | NO |
| 4146311  | Leriche's syndrome                                           | 307816004      | SNOMED | NO  | YES | NO |
| 4329847  | Myocardial infarction                                        | 22298006       | SNOMED | NO  | YES | NO |
| 4296029  | Periarteritis                                                | 76805007       | SNOMED | NO  | YES | NO |
| 260841   | Perinatal subarachnoid hemorrhage                            | 21202004       | SNOMED | YES | YES | NO |
| 317309   | Peripheral arterial occlusive disease                        | 399957001      | SNOMED | NO  | YES | NO |
| 321822   | Peripheral vascular disorder due to diabetes mellitus        | 421895002      | SNOMED | NO  | YES | NO |
| 313928   | Peripheral vascular complication                             | 10596002       | SNOMED | NO  | YES | NO |
| 321052   | Peripheral vascular disease                                  | 400047006      | SNOMED | NO  | NO  | NO |
| 44782775 | Peripheral vascular disease associated with another disorder | 34881000119105 | SNOMED | NO  | YES | NO |
| 318137   | Phlebitis and thrombophlebitis of intracranial sinuses       | 192753009      | SNOMED | YES | YES | NO |
| 441039   | Phlebitis of lower limb vein                                 | 312588002      | SNOMED | NO  | YES | NO |
| 4067424  | Polyarteritis                                                | 20258000       | SNOMED | NO  | YES | NO |
| 320749   | Polyarteritis nodosa                                         | 155441006      | SNOMED | YES | YES | NO |
| 443239   | Precerebral arterial occlusion                               | 266253001      | SNOMED | NO  | YES | NO |
| 440417   | Pulmonary embolism                                           | 59282003       | SNOMED | YES | YES | NO |
| 4318842  | Renal vasculitis                                             | 95578000       | SNOMED | NO  | YES | NO |
| 380943   | Rupture of syphilitic cerebral aneurysm                      | 186893003      | SNOMED | YES | YES | NO |
| 432923   | Subarachnoid hemorrhage                                      | 21454007       | SNOMED | NO  | YES | NO |
| 439040   | Subdural hemorrhage                                          | 35486000       | SNOMED | NO  | YES | NO |
| 320741   | Thrombophlebitis                                             | 64156001       | SNOMED | YES | YES | NO |
| 4141106  | Thrombosis of arteries of the extremities                    | 33591000       | SNOMED | NO  | YES | NO |
| 4132546  | Traumatic brain injury                                       | 127295002      | SNOMED | YES | YES | NO |
| 4194610  | Trunk arterial embolus                                       | 312593004      | SNOMED | NO  | YES | NO |
| 318169   | Varicose veins of lower extremity                            | 72866009       | SNOMED | YES | YES | NO |
| 4189293  | Vascular disorder of lower extremity                         | 373408007      | SNOMED | NO  | YES | NO |
| 443752   | Ventricular hemorrhage                                       | 23276006       | SNOMED | YES | YES | NO |
| 432346   | Dissection of vertebral artery                               | 230730001      | SNOMED | YES | YES | NO |



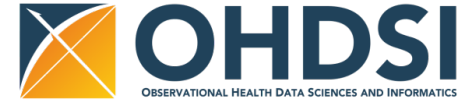

## A.4.10 Concept: Procedures indicating established cardiovascular disease

| Concept ID | Concept Name                               | Code     | Vocabulary | Excluded | Descendants | Mapped |
|------------|--------------------------------------------|----------|------------|----------|-------------|--------|
| 4150819    | Operative procedure on coronary artery     | 31413008 | SNOMED     | NO       | YES         | NO     |
| 4331725    | Operative procedure on artery of extremity | 22701007 | SNOMED     | NO       | YES         | NO     |

## A.4.11 Without renal impairment

Entry events having no condition occurrences of 'Renal impairment', starting anytime on or before cohort entry start date; allow events outside observation period.

## A.4.12 Renal impairment

Entry events having at least 1 condition occurrence of 'Renal impairment', starting anytime on or before cohort entry start date; allow events outside observation period.

## A.4.13 Concept: Renal impairment

| Concept ID | Concept Name     | Code      | Vocabulary | Excluded | Descendants | Mapped |
|------------|------------------|-----------|------------|----------|-------------|--------|
| 4030518    | Renal impairment | 236423003 | SNOMED     | NO       | YES         | NO     |

## A.5 Drug-vs-Drug Exposure (Alogliptin New-User) Cohort / OT1

### A.5.1 Cohort Entry Events

People with continuous observation of 365 days before event may enter the cohort when observing any of the following:

1. drug exposure of 'alogliptin' for the first time in the person's history.

Limit cohort entry events to the earliest event per person.

Restrict entry events to with all of the following criteria:

1. with the following event criteria: who are  $\geq 18$  years old.
2. having at least 1 condition occurrence of 'Type 2 diabetes mellitus', starting anytime on or before cohort entry start date; allow events outside observation period.
3. having no condition occurrences of 'Type 1 diabetes mellitus', starting anytime on or before cohort entry start date; allow events outside observation period.
4. having no condition occurrences of 'Secondary diabetes mellitus', starting anytime on or before cohort entry start date; allow events outside observation period.

### **A.5.2 Additional Inclusion Criteria**

- No prior with-in class exposure

Entry events having no drug exposures of 'DPP4 inhibitors excluding alogliptin', starting anytime on or before cohort entry start date; allow events outside observation period.

- No prior GLP-1 receptor agonist exposure

Entry events having no drug exposures of 'GLP-1 receptor agonists', starting anytime on or before cohort entry start date; allow events outside observation period.

- No prior SGLT-2 inhibitor exposure

Entry events having no drug exposures of 'SGLT2 inhibitors', starting anytime on or before cohort entry start date; allow events outside observation period.

- No prior SU exposure

Entry events having no drug exposures of 'Sulfonylureas', starting anytime on or before cohort entry start date; allow events outside observation period.

- No prior other anti-diabetic exposure

Entry events having no drug exposures of 'Other anti-diabetics', starting anytime on or before cohort entry start date; allow events outside observation period.

- Prior metformin use

Entry events with any of the following criteria:



1. having at least 1 drug era of 'Metformin', starting anytime up to 90 days before cohort entry start date; allow events outside observation period; with era length  $\geq 90$  days.
  2. having at least 3 drug exposures of 'Metformin', starting anytime on or before cohort entry start date; allow events outside observation period.
- No prior insulin use or combo initiation: Proxy for  $< 30$  days drug era anytime before index and no combination use on index

Entry events having no drug eras of 'Insulin', starting anytime on or before cohort entry start date; allow events outside observation period; with era length  $> 30$  days.

### A.5.3 Cohort Exit

The cohort end date will be based on a continuous exposure to 'alogliptin': allowing 30 days between exposures, adding 0 days after exposure ends, and using days supply and exposure end date for exposure duration.

### A.5.4 Cohort Eras

Entry events will be combined into cohort eras if they are within 0 days of each other.

### A.5.5 Concept: alogliptin

---

| Concept ID | Concept Name | Code    | Vocabulary | Excluded | Descendants | Mapped |
|------------|--------------|---------|------------|----------|-------------|--------|
| 43013884   | alogliptin   | 1368001 | RxNorm     | NO       | YES         | NO     |

### A.5.6 Concept: DPP4 inhibitors excluding alogliptin

---

| Concept ID | Concept Name | Code    | Vocabulary | Excluded | Descendants | Mapped |
|------------|--------------|---------|------------|----------|-------------|--------|
| 40239216   | linagliptin  | 1100699 | RxNorm     | NO       | YES         | NO     |
| 40166035   | saxagliptin  | 857974  | RxNorm     | NO       | YES         | NO     |
| 1580747    | sitagliptin  | 593411  | RxNorm     | NO       | YES         | NO     |
| 19122137   | vildagliptin | 596554  | RxNorm     | NO       | YES         | NO     |

---

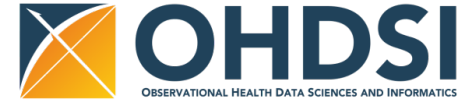

## B Outcome Cohort Definitions

### B.1 3-point MACE

#### B.1.1 Cohort Entry Events

People may enter the cohort when observing any of the following:

1. condition occurrences of 'Acute myocardial Infarction'.
2. condition occurrences of 'Sudden cardiac death'.
3. condition occurrences of 'Ischemic stroke'.
4. condition occurrences of 'Intracranial bleed Hemorrhagic stroke'.

Restrict entry events to having at least 1 visit occurrence of 'Inpatient or ER visit', starting anytime on or before cohort entry start date and ending between 0 days before and all days after cohort entry start date.

#### B.1.2 Cohort Exit

The cohort end date will be offset from index event's start date plus 7 days.

#### B.1.3 Cohort Eras

Entry events will be combined into cohort eras if they are within 180 days of each other.

#### B.1.4 Concept: Inpatient or ER visit

| Concept ID | Concept Name                       | Code | Vocabulary | Excluded | Descendants | Mapped |
|------------|------------------------------------|------|------------|----------|-------------|--------|
| 262        | Emergency Room and Inpatient Visit | ERIP | Visit      | NO       | YES         | NO     |
| 9203       | Emergency Room Visit               | ER   | Visit      | NO       | YES         | NO     |
| 9201       | Inpatient Visit                    | IP   | Visit      | NO       | YES         | NO     |

#### B.1.5 Concept: Acute myocardial Infarction

| Concept ID | Concept Name | Code | Vocabulary | Excluded | Descendants | Mapped |
|------------|--------------|------|------------|----------|-------------|--------|
|------------|--------------|------|------------|----------|-------------|--------|



|         |                           |          |        |     |     |    |
|---------|---------------------------|----------|--------|-----|-----|----|
| 4329847 | Myocardial infarction     | 22298006 | SNOMED | NO  | YES | NO |
| 314666  | Old myocardial infarction | 1755008  | SNOMED | YES | YES | NO |

### B.1.6 Concept: Sudden cardiac death

| Concept ID | Concept Name                                       | Code      | Vocabulary | Excluded | Descendants | Mapped |
|------------|----------------------------------------------------|-----------|------------|----------|-------------|--------|
| 4048809    | Brainstem death                                    | 230802007 | SNOMED     | NO       | YES         | NO     |
| 321042     | Cardiac arrest                                     | 410429000 | SNOMED     | NO       | YES         | NO     |
| 442289     | Death in less than 24 hours from onset of symptoms | 53559009  | SNOMED     | NO       | YES         | NO     |
| 4317150    | Sudden cardiac death                               | 95281009  | SNOMED     | NO       | YES         | NO     |
| 4132309    | Sudden death                                       | 26636000  | SNOMED     | NO       | YES         | NO     |
| 437894     | Ventricular fibrillation                           | 71908006  | SNOMED     | YES      | YES         | NO     |

### B.1.7 Concept: Ischemic stroke

| Concept ID | Concept Name              | Code      | Vocabulary | Excluded | Descendants | Mapped |
|------------|---------------------------|-----------|------------|----------|-------------|--------|
| 372924     | Cerebral artery occlusion | 20059004  | SNOMED     | NO       | NO          | NO     |
| 375557     | Cerebral embolism         | 75543006  | SNOMED     | NO       | NO          | NO     |
| 443454     | Cerebral infarction       | 432504007 | SNOMED     | NO       | YES         | NO     |
| 441874     | Cerebral thrombosis       | 71444005  | SNOMED     | NO       | NO          | NO     |

### B.1.8 Concept: Intracranial bleed Hemorrhagic stroke

| Concept ID | Concept Name                        | Code            | Vocabulary | Excluded | Descendants | Mapped |
|------------|-------------------------------------|-----------------|------------|----------|-------------|--------|
| 376713     | Cerebral hemorrhage                 | 274100004       | SNOMED     | NO       | NO          | NO     |
| 439847     | Intracranial hemorrhage             | 1386000         | SNOMED     | NO       | NO          | NO     |
| 432923     | Subarachnoid hemorrhage             | 21454007        | SNOMED     | NO       | NO          | NO     |
| 43530727   | Spontaneous cerebral hemorrhage     | 291571000119106 | SNOMED     | NO       | NO          | NO     |
| 4148906    | Spontaneous subarachnoid hemorrhage | 270907008       | SNOMED     | NO       | NO          | NO     |

### B.1.9 Concept: Heart Failure

| Concept ID | Concept Name                       | Code     | Vocabulary | Excluded | Descendants | Mapped |
|------------|------------------------------------|----------|------------|----------|-------------|--------|
| 315295     | Congestive rheumatic heart failure | 82523003 | SNOMED     | YES      | YES         | NO     |
| 316139     | Heart failure                      | 84114007 | SNOMED     | NO       | YES         | NO     |



## B.2 4-point MACE

### B.2.1 Cohort Entry Events

People may enter the cohort when observing any of the following:

1. condition occurrences of 'Acute myocardial Infarction'.
2. condition occurrences of 'Sudden cardiac death'.
3. condition occurrences of 'Ischemic stroke'.
4. condition occurrences of 'Intracranial bleed Hemorrhagic stroke'.
5. condition occurrences of 'Heart Failure'.

Restrict entry events to having at least 1 visit occurrence of 'Inpatient or ER visit', starting anytime on or before cohort entry start date and ending between 0 days before and all days after cohort entry start date.

### B.2.2 Cohort Exit

The cohort end date will be offset from index event's start date plus 7 days.

### B.2.3 Cohort Eras

Entry events will be combined into cohort eras if they are within 180 days of each other.

### B.2.4 Concept: Inpatient or ER visit

| Concept ID | Concept Name                       | Code | Vocabulary | Excluded | Descendants | Mapped |
|------------|------------------------------------|------|------------|----------|-------------|--------|
| 262        | Emergency Room and Inpatient Visit | ERIP | Visit      | NO       | YES         | NO     |
| 9203       | Emergency Room Visit               | ER   | Visit      | NO       | YES         | NO     |
| 9201       | Inpatient Visit                    | IP   | Visit      | NO       | YES         | NO     |

### B.2.5 Concept: Acute myocardial Infarction

| Concept ID | Concept Name          | Code     | Vocabulary | Excluded | Descendants | Mapped |
|------------|-----------------------|----------|------------|----------|-------------|--------|
| 4329847    | Myocardial infarction | 22298006 | SNOMED     | NO       | YES         | NO     |



|        |                           |         |        |     |     |    |
|--------|---------------------------|---------|--------|-----|-----|----|
| 314666 | Old myocardial infarction | 1755008 | SNOMED | YES | YES | NO |
|--------|---------------------------|---------|--------|-----|-----|----|

## B.2.6 Concept: Sudden cardiac death

| Concept ID | Concept Name                                       | Code      | Vocabulary | Excluded | Descendants | Mapped |
|------------|----------------------------------------------------|-----------|------------|----------|-------------|--------|
| 4048809    | Brainstem death                                    | 230802007 | SNOMED     | NO       | YES         | NO     |
| 321042     | Cardiac arrest                                     | 410429000 | SNOMED     | NO       | YES         | NO     |
| 442289     | Death in less than 24 hours from onset of symptoms | 53559009  | SNOMED     | NO       | YES         | NO     |
| 4317150    | Sudden cardiac death                               | 95281009  | SNOMED     | NO       | YES         | NO     |
| 4132309    | Sudden death                                       | 26636000  | SNOMED     | NO       | YES         | NO     |
| 437894     | Ventricular fibrillation                           | 71908006  | SNOMED     | YES      | YES         | NO     |

## B.2.7 Concept: Ischemic stroke

| Concept ID | Concept Name              | Code      | Vocabulary | Excluded | Descendants | Mapped |
|------------|---------------------------|-----------|------------|----------|-------------|--------|
| 372924     | Cerebral artery occlusion | 20059004  | SNOMED     | NO       | NO          | NO     |
| 375557     | Cerebral embolism         | 75543006  | SNOMED     | NO       | NO          | NO     |
| 443454     | Cerebral infarction       | 432504007 | SNOMED     | NO       | YES         | NO     |
| 441874     | Cerebral thrombosis       | 71444005  | SNOMED     | NO       | NO          | NO     |

## B.2.8 Concept: Intracranial bleed Hemorrhagic stroke

| Concept ID | Concept Name                        | Code            | Vocabulary | Excluded | Descendants | Mapped |
|------------|-------------------------------------|-----------------|------------|----------|-------------|--------|
| 376713     | Cerebral hemorrhage                 | 274100004       | SNOMED     | NO       | NO          | NO     |
| 439847     | Intracranial hemorrhage             | 1386000         | SNOMED     | NO       | NO          | NO     |
| 432923     | Subarachnoid hemorrhage             | 21454007        | SNOMED     | NO       | NO          | NO     |
| 43530727   | Spontaneous cerebral hemorrhage     | 291571000119106 | SNOMED     | NO       | NO          | NO     |
| 4148906    | Spontaneous subarachnoid hemorrhage | 270907008       | SNOMED     | NO       | NO          | NO     |

## B.2.9 Concept: Heart Failure

| Concept ID | Concept Name                       | Code     | Vocabulary | Excluded | Descendants | Mapped |
|------------|------------------------------------|----------|------------|----------|-------------|--------|
| 315295     | Congestive rheumatic heart failure | 82523003 | SNOMED     | YES      | YES         | NO     |
| 316139     | Heart failure                      | 84114007 | SNOMED     | NO       | YES         | NO     |

## B.3 Acute myocardial infarction

### B.3.1 Cohort Entry Events

People may enter the cohort when observing any of the following:



1. condition occurrences of '[LEGEND-T2DM] Acute myocardial Infarction'.

Restrict entry events to having at least 1 visit occurrence of 'Inpatient or ER visit', starting anytime on or before cohort entry start date and ending between 0 days before and all days after cohort entry start date.

### B.3.2 Cohort Exit

The cohort end date will be offset from index event's start date plus 7 days.

### B.3.3 Cohort Eras

Entry events will be combined into cohort eras if they are within 180 days of each other.

### B.3.4 Concept: Inpatient or ER visit

| Concept ID | Concept Name                       | Code | Vocabulary | Excluded | Descendants | Mapped |
|------------|------------------------------------|------|------------|----------|-------------|--------|
| 262        | Emergency Room and Inpatient Visit | ERIP | Visit      | NO       | YES         | NO     |
| 9203       | Emergency Room Visit               | ER   | Visit      | NO       | YES         | NO     |
| 9201       | Inpatient Visit                    | IP   | Visit      | NO       | YES         | NO     |

### B.3.5 Concept: [LEGEND-T2DM] Acute myocardial Infarction

| Concept ID | Concept Name              | Code     | Vocabulary | Excluded | Descendants | Mapped |
|------------|---------------------------|----------|------------|----------|-------------|--------|
| 4329847    | Myocardial infarction     | 22298006 | SNOMED     | NO       | YES         | NO     |
| 314666     | Old myocardial infarction | 1755008  | SNOMED     | YES      | YES         | NO     |

## B.4 Acute renal failure

### B.4.1 Cohort Entry Events

People may enter the cohort when observing any of the following:

1. condition occurrences of 'Acute Renal Failure'.

Restrict entry events to having at least 1 visit occurrence of 'Inpatient or ER visit', starting anytime on or before cohort entry start date and ending between 0 days before and all days after cohort entry start date.





## B.4.2 Cohort Exit

The cohort end date will be offset from index event's start date plus 30 days.

## B.4.3 Cohort Eras

Entry events will be combined into cohort eras if they are within 30 days of each other.

## B.4.4 Concept: Inpatient or ER visit

| Concept ID | Concept Name                       | Code | Vocabulary | Excluded | Descendants | Mapped |
|------------|------------------------------------|------|------------|----------|-------------|--------|
| 262        | Emergency Room and Inpatient Visit | ERIP | Visit      | NO       | YES         | NO     |
| 9203       | Emergency Room Visit               | ER   | Visit      | NO       | YES         | NO     |
| 9201       | Inpatient Visit                    | IP   | Visit      | NO       | YES         | NO     |

## B.4.5 Concept: Acute Renal Failure

| Concept ID | Concept Name                                      | Code      | Vocabulary | Excluded | Descendants | Mapped |
|------------|---------------------------------------------------|-----------|------------|----------|-------------|--------|
| 197320     | Acute renal failure syndrome                      | 14669001  | SNOMED     | NO       | YES         | NO     |
| 432961     | Acute renal papillary necrosis with renal failure | 298015003 | SNOMED     | NO       | YES         | NO     |
| 444044     | Acute tubular necrosis                            | 35455006  | SNOMED     | NO       | YES         | NO     |

## B.5 Glycemic control

### B.5.1 Cohort Entry Events

People enter the cohort when observing any of the following:

1. measurements of 'HbA1c\_v2', numeric value  $\leq 7$ ; unit: "percent".
2. measurements of 'HbA1c\_v2', numeric value  $\leq 53$ ; unit: "millimole per mole".

Limit qualifying entry events to the earliest event per person.

### B.5.2 Cohort Exit

The cohort end date will be offset from index event's start date plus 1 day.



### B.5.3 Cohort Eras

Entry events will be combined into cohort eras if they are within 90 days of each other.

### B.5.4 Concept: HbA1c\_v2

| Concept ID | Concept Name                                                | Code    | Vocabulary | Excluded | Descendants | Mapped |
|------------|-------------------------------------------------------------|---------|------------|----------|-------------|--------|
| 3004410    | Hemoglobin A1c (Glycated)                                   | 4548-4  | LOINC      | NO       | YES         | NO     |
| 3007263    | Hemoglobin A1c/Hemoglobin.total in Blood by calculation     | 17855-8 | LOINC      | NO       | YES         | NO     |
| 3003309    | Hemoglobin A1c/Hemoglobin.total in Blood by Electrophoresis | 4549-2  | LOINC      | NO       | YES         | NO     |
| 3005673    | Hemoglobin A1c/Hemoglobin.total in Blood by HPLC            | 17856-6 | LOINC      | NO       | YES         | NO     |
| 40762352   | Hemoglobin A1c/Hemoglobin.total in Blood by IFCC protocol   | 59261-8 | LOINC      | NO       | YES         | NO     |
| 40758583   | Hemoglobin A1c in Blood                                     | 55454-3 | LOINC      | NO       | YES         | NO     |
| 3034639    | Hemoglobin A1c [Mass/volume] in Blood                       | 41995-2 | LOINC      | NO       | YES         | NO     |

## B.6 Hospitalization with heart failure

### B.6.1 Cohort Entry Events

People enter the cohort when observing any of the following:

1. visit occurrences of 'Inpatient or ER visit'; having at least 1 condition occurrence of '[LEGEND-T2DM] Heart Failure', starting between 0 days before and all days after 'Inpatient or ER visit' start date and starting anytime on or before 'Inpatient or ER visit' end date.

### B.6.2 Cohort Exit

The cohort end date will be offset from index event's end date plus 0 days.

### B.6.3 Cohort Eras

Entry events will be combined into cohort eras if they are within 7 days of each other.

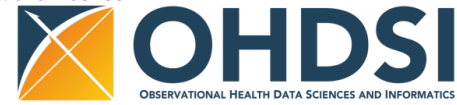

## B.6.4 Concept: Inpatient or ER visit

| Concept ID | Concept Name                       | Code | Vocabulary | Excluded | Descendants | Mapped |
|------------|------------------------------------|------|------------|----------|-------------|--------|
| 262        | Emergency Room and Inpatient Visit | ERIP | Visit      | NO       | YES         | NO     |
| 9203       | Emergency Room Visit               | ER   | Visit      | NO       | YES         | NO     |
| 9201       | Inpatient Visit                    | IP   | Visit      | NO       | YES         | NO     |

## B.6.5 Concept: [LEGEND-T2DM] Heart Failure

| Concept ID | Concept Name                       | Code     | Vocabulary | Excluded | Descendants | Mapped |
|------------|------------------------------------|----------|------------|----------|-------------|--------|
| 315295     | Congestive rheumatic heart failure | 82523003 | SNOMED     | YES      | YES         | NO     |
| 316139     | Heart failure                      | 84114007 | SNOMED     | NO       | YES         | NO     |

## B.7 Measured renal dysfunction

### B.7.1 Cohort Entry Events

People enter the cohort when observing any of the following:

1. measurements of 'Creatinine measurement', numeric value > 3; unit: "milligram per deciliter".
2. measurements of 'Creatinine measurement', numeric value > 265; unit: "micro-mole/liter".
3. measurements of 'Creatinine measurement', numeric value > 0.265; unit: "millimole per liter".
4. measurements of 'Creatinine measurement', numeric value > 3; unit: "milligram".

Limit cohort entry events to the earliest event per person.

### B.7.2 Cohort Exit

The cohort end date will be offset from index event's start date plus 1 day.



### B.7.3 Cohort Eras

Entry events will be combined into cohort eras if they are within 0 days of each other.

### B.7.4 Concept: Creatinine measurement

| Concept ID | Concept Name                                              | Code    | Vocabulary | Excluded | Descendants | Mapped |
|------------|-----------------------------------------------------------|---------|------------|----------|-------------|--------|
| 3016723    | Creatinine [Mass/volume] in Serum or Plasma               | 2160-0  | LOINC      | NO       | YES         | NO     |
| 3022243    | Creatinine [Mass/volume] in Serum or Plasma –pre dialysis | 11042-9 | LOINC      | NO       | YES         | NO     |
| 3020564    | Creatinine [Moles/volume] in Serum or Plasma              | 14682-9 | LOINC      | NO       | YES         | NO     |

## B.8 Revascularization

### B.8.1 Cohort Entry Events

People may enter the cohort when observing any of the following:

1. procedure occurrences of 'PCI'.
2. procedure occurrences of 'CABG'.

### B.8.2 Additional Inclusion Criteria

- Hospitalization

Entry events having at least 1 visit occurrence of 'Hospitalization', starting between 0 days before and 0 days after cohort entry start date.

### B.8.3 Cohort Exit

The cohort end date will be offset from index event's start date plus 1 day.

### B.8.4 Cohort Eras

Entry events will be combined into cohort eras if they are within 0 days of each other.



## B.8.5 Concept: PCI

| Concept ID | Concept Name                                                                                                                                                                                                                         | Code            | Vocabulary | Excluded | Descendants | Mapped |
|------------|--------------------------------------------------------------------------------------------------------------------------------------------------------------------------------------------------------------------------------------|-----------------|------------|----------|-------------|--------|
| 4006788    | Percutaneous transluminal coronary angioplasty                                                                                                                                                                                       | 11101003        | SNOMED     | NO       | YES         | NO     |
| 4264285    | Percutaneous transluminal coronary angioplasty by rotoablation                                                                                                                                                                       | 397193006       | SNOMED     | NO       | YES         | NO     |
| 4265293    | Percutaneous transluminal coronary angioplasty with rotoablation, single vessel                                                                                                                                                      | 397431004       | SNOMED     | NO       | YES         | NO     |
| 4225903    | Percutaneous transluminal coronary angioplasty, multiple vessels                                                                                                                                                                     | 85053006        | SNOMED     | NO       | YES         | NO     |
| 4283892    | Placement of stent in coronary artery                                                                                                                                                                                                | 36969009        | SNOMED     | NO       | YES         | NO     |
| 4337738    | Percutaneous endarterectomy of coronary artery                                                                                                                                                                                       | 232726007       | SNOMED     | NO       | YES         | NO     |
| 4139198    | Percutaneous transluminal thrombolysis of artery                                                                                                                                                                                     | 426485003       | SNOMED     | NO       | YES         | NO     |
| 44511532   | Percutaneous transluminal thrombolysis of artery                                                                                                                                                                                     | L71.6           | OPCS4      | NO       | YES         | NO     |
| 45770795   | Percutaneous transluminal balloon angioplasty and insertion of drug eluting stent into coronary artery                                                                                                                               | 936451000000108 | SNOMED     | NO       | YES         | NO     |
| 44789455   | Insertion of drug-eluting coronary artery stent                                                                                                                                                                                      | 203741000000101 | SNOMED     | NO       | NO          | NO     |
| 44784573   | Percutaneous transluminal atherectomy of coronary artery by rotary cutter using fluoroscopic guidance                                                                                                                                | 698740005       | SNOMED     | NO       | YES         | NO     |
| 44512256   | Percutaneous transluminal arterial thrombolysis and reconstruction                                                                                                                                                                   | L66.1           | OPCS4      | NO       | YES         | NO     |
| 44511273   | Unspecified percutaneous transluminal balloon angioplasty and insertion of stent into coronary artery                                                                                                                                | K75.9           | OPCS4      | NO       | YES         | NO     |
| 44511272   | Other specified percutaneous transluminal balloon angioplasty and insertion of stent into coronary artery                                                                                                                            | K75.8           | OPCS4      | NO       | NO          | NO     |
| 44511271   | Percutaneous transluminal balloon angioplasty and insertion of 3 or more stents into coronary artery NEC                                                                                                                             | K75.4           | OPCS4      | NO       | YES         | NO     |
| 44511269   | Percutaneous transluminal balloon angioplasty and insertion of 3 or more drug-eluting stents into coronary artery                                                                                                                    | K75.2           | OPCS4      | NO       | YES         | NO     |
| 44511268   | Percutaneous transluminal balloon angioplasty and insertion of 1-2 drug-eluting stents into coronary artery                                                                                                                          | K75.1           | OPCS4      | NO       | YES         | NO     |
| 44511133   | Other specified transluminal balloon angioplasty of coronary artery                                                                                                                                                                  | K49.8           | OPCS4      | NO       | NO          | NO     |
| 44511131   | Percutaneous transluminal balloon angioplasty of bypass graft of coronary artery                                                                                                                                                     | K49.3           | OPCS4      | NO       | YES         | NO     |
| 44511130   | Percutaneous transluminal balloon angioplasty of multiple coronary arteries                                                                                                                                                          | K49.2           | OPCS4      | NO       | YES         | NO     |
| 43533353   | Percutaneous transluminal coronary atherectomy, with drug eluting intracoronary stent, with coronary angioplasty when performed; single major coronary artery or branch                                                              | C9602           | HCPCS      | NO       | YES         | NO     |
| 43533352   | Percutaneous transcatheter placement of drug-eluting intracoronary stent(s), with coronary angioplasty when performed; each additional branch of a major coronary artery (list separately in addition to code for primary procedure) | C9601           | HCPCS      | NO       | NO          | NO     |



|          |                                                                                                                                                                                                                                                |           |          |    |     |    |
|----------|------------------------------------------------------------------------------------------------------------------------------------------------------------------------------------------------------------------------------------------------|-----------|----------|----|-----|----|
| 43533248 | Percutaneous transluminal coronary atherectomy, with drug-eluting intracoronary stent, with coronary angioplasty when performed; each additional branch of a major coronary artery (list separately in addition to code for primary procedure) | C9603     | HCPCS    | NO | YES | NO |
| 43533247 | Percutaneous transcatheter placement of drug eluting intracoronary stent(s), with coronary angioplasty when performed; single major coronary artery or branch                                                                                  | C9600     | HCPCS    | NO | NO  | NO |
| 43531440 | Percutaneous transluminal insertion of metal stent into coronary artery using fluoroscopic guidance                                                                                                                                            | 609154002 | SNOMED   | NO | YES | NO |
| 43531439 | Percutaneous insertion of drug eluting stent into coronary artery using fluoroscopic guidance                                                                                                                                                  | 609153008 | SNOMED   | NO | NO  | NO |
| 43531438 | Percutaneous insertion of stent into aneurysm of coronary artery using fluoroscopic guidance                                                                                                                                                   | 609152003 | SNOMED   | NO | NO  | NO |
| 4329263  | Placement of stent in circumflex branch of left coronary artery                                                                                                                                                                                | 429499003 | SNOMED   | NO | YES | NO |
| 4328103  | Infusion of intra-arterial thrombolytic agent with percutaneous transluminal coronary angioplasty                                                                                                                                              | 75761004  | SNOMED   | NO | NO  | NO |
| 4264286  | Percutaneous rotational coronary endarterectomy                                                                                                                                                                                                | 397194000 | SNOMED   | NO | NO  | NO |
| 4238755  | Infusion of intra-arterial thrombolytic agent with percutaneous transluminal coronary angioplasty, single vessel                                                                                                                               | 91338001  | SNOMED   | NO | NO  | NO |
| 4216356  | Infusion of intra-arterial thrombolytic agent with percutaneous transluminal coronary angioplasty, multiple vessels                                                                                                                            | 80762004  | SNOMED   | NO | NO  | NO |
| 4214516  | Insertion of drug coated stent                                                                                                                                                                                                                 | 414509005 | SNOMED   | NO | NO  | NO |
| 4181025  | Percutaneous transluminal balloon angioplasty with insertion of stent into coronary artery                                                                                                                                                     | 429639007 | SNOMED   | NO | YES | NO |
| 4178148  | Placement of stent in anterior descending branch of left coronary artery                                                                                                                                                                       | 428488008 | SNOMED   | NO | YES | NO |
| 4175997  | Percutaneous transluminal thrombolysis and reconstruction of artery                                                                                                                                                                            | 428068004 | SNOMED   | NO | YES | NO |
| 4171077  | Fluoroscopic angiography of coronary artery and insertion of stent                                                                                                                                                                             | 418982001 | SNOMED   | NO | NO  | NO |
| 4020653  | Percutaneous transluminal balloon angioplasty of bypass graft of coronary artery                                                                                                                                                               | 175066001 | SNOMED   | NO | YES | NO |
| 2001506  | Insertion of drug-eluting coronary artery stent(s)                                                                                                                                                                                             | 36.07     | ICD9Proc | NO | NO  | NO |
| 2001505  | Insertion of non-drug-eluting coronary artery stent(s)                                                                                                                                                                                         | 36.06     | ICD9Proc | NO | NO  | NO |
| 2000064  | Percutaneous transluminal coronary angioplasty [PTCA]                                                                                                                                                                                          | 00.66     | ICD9Proc | NO | YES | NO |
| 2001500  | Single vessel percutaneous transluminal coronary angioplasty [PTCA] or coronary atherectomy without mention of thrombolytic agent                                                                                                              | 36.01     | ICD9Proc | NO | YES | NO |
| 2001504  | Multiple vessel percutaneous transluminal coronary angioplasty [PTCA] or coronary atherectomy performed during the same operation, with or without mention of thrombolytic agent                                                               | 36.05     | ICD9Proc | NO | NO  | NO |



|         |                                                                                                                                |       |          |    |     |    |
|---------|--------------------------------------------------------------------------------------------------------------------------------|-------|----------|----|-----|----|
| 2001501 | Single vessel percutaneous transluminal coronary angioplasty [PTCA] or coronary atherectomy with mention of thrombolytic agent | 36.02 | ICD9Proc | NO | YES | NO |
|---------|--------------------------------------------------------------------------------------------------------------------------------|-------|----------|----|-----|----|

### B.8.6 Concept: Hospitalization

| Concept ID | Concept Name                       | Code | Vocabulary | Excluded | Descendants | Mapped |
|------------|------------------------------------|------|------------|----------|-------------|--------|
| 262        | Emergency Room and Inpatient Visit | ERIP | Visit      | NO       | YES         | NO     |
| 9203       | Emergency Room Visit               | ER   | Visit      | NO       | YES         | NO     |
| 9201       | Inpatient Visit                    | IP   | Visit      | NO       | YES         | NO     |

### B.8.7 Concept: CABG

| Concept ID | Concept Name                                                                          | Code         | Vocabulary | Excluded | Descendants | Mapped |
|------------|---------------------------------------------------------------------------------------|--------------|------------|----------|-------------|--------|
| 2001516    | Abdominal-coronary artery bypass                                                      | 36.17        | ICD9Proc   | NO       | YES         | NO     |
| 4284104    | Aortocoronary artery bypass graft                                                     | 67166004.00  | SNOMED     | NO       | YES         | NO     |
| 4229433    | Aortocoronary artery bypass graft with prosthesis                                     | 8876004.00   | SNOMED     | NO       | YES         | NO     |
| 4146972    | Aortocoronary artery bypass graft with saphenous vein graft                           | 3546002.00   | SNOMED     | NO       | YES         | NO     |
| 4228305    | Aortocoronary artery bypass graft with three vein grafts                              | 405599002.00 | SNOMED     | NO       | YES         | NO     |
| 4228304    | Aortocoronary artery bypass graft with two vein grafts                                | 405598005.00 | SNOMED     | NO       | YES         | NO     |
| 4063237    | Aortocoronary artery bypass graft with vein graft                                     | 17073005.00  | SNOMED     | NO       | YES         | NO     |
| 4148030    | Aortocoronary bypass grafting                                                         | 309814006.00 | SNOMED     | NO       | YES         | NO     |
| 4008625    | Aortocoronary bypass of four or more coronary arteries                                | 10190003.00  | SNOMED     | NO       | YES         | NO     |
| 4106548    | Aortocoronary bypass of one coronary artery                                           | 29819009.00  | SNOMED     | NO       | YES         | NO     |
| 4031996    | Aortocoronary bypass of three coronary arteries                                       | 14323007.00  | SNOMED     | NO       | YES         | NO     |
| 4234990    | Aortocoronary bypass of two coronary arteries                                         | 90487008.00  | SNOMED     | NO       | YES         | NO     |
| 45889469   | Arterial Grafting for Coronary Artery Bypass                                          | 1006216.00   | CPT4       | NO       | YES         | NO     |
| 4240486    | Carotid-subclavian artery bypass graft with vein                                      | 59012002.00  | SNOMED     | NO       | YES         | NO     |
| 4336464    | Coronary artery bypass graft                                                          | 232717009.00 | SNOMED     | NO       | YES         | NO     |
| 4337056    | Coronary artery bypass graft x 1                                                      | 232719007.00 | SNOMED     | NO       | YES         | NO     |
| 4000733    | Coronary artery bypass graft, anastomosis of artery of thorax to coronary artery      | 119565001.00 | SNOMED     | NO       | YES         | NO     |
| 4336467    | Coronary artery bypass grafts greater than 5                                          | 232724005.00 | SNOMED     | NO       | YES         | NO     |
| 4336465    | Coronary artery bypass grafts x 2                                                     | 232720001.00 | SNOMED     | NO       | YES         | NO     |
| 4339629    | Coronary artery bypass grafts x 3                                                     | 232721002.00 | SNOMED     | NO       | YES         | NO     |
| 4337737    | Coronary artery bypass grafts x 4                                                     | 232722009.00 | SNOMED     | NO       | YES         | NO     |
| 4336466    | Coronary artery bypass grafts x 5                                                     | 232723004.00 | SNOMED     | NO       | YES         | NO     |
| 4233421    | Coronary artery bypass with autogenous graft of internal mammary artery, single graft | 359601003.00 | SNOMED     | NO       | YES         | NO     |
| 4305509    | Coronary artery bypass with autogenous graft, five grafts                             | 82247006.00  | SNOMED     | NO       | YES         | NO     |
| 4309432    | Coronary artery bypass with autogenous graft, four grafts                             | 39202005.00  | SNOMED     | NO       | YES         | NO     |

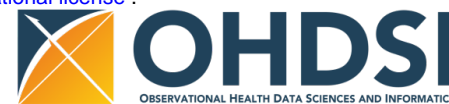

|          |                                                                                                                                                          |              |          |    |     |    |
|----------|----------------------------------------------------------------------------------------------------------------------------------------------------------|--------------|----------|----|-----|----|
| 4011931  | Coronary artery bypass with autogenous graft, three grafts                                                                                               | 10326007.00  | SNOMED   | NO | YES | NO |
| 4253805  | Coronary artery bypass with autogenous graft, two grafts                                                                                                 | 74371005.00  | SNOMED   | NO | YES | NO |
| 45887879 | Coronary artery bypass, using arterial graft(s)                                                                                                          | 1006217.00   | CPT4     | NO | YES | NO |
| 2107242  | Coronary artery bypass, using arterial graft(s); 2 coronary arterial grafts                                                                              | 33534.00     | CPT4     | NO | YES | NO |
| 2107243  | Coronary artery bypass, using arterial graft(s); 3 coronary arterial grafts                                                                              | 33535.00     | CPT4     | NO | YES | NO |
| 2107244  | Coronary artery bypass, using arterial graft(s); 4 or more coronary arterial grafts                                                                      | 33536.00     | CPT4     | NO | YES | NO |
| 2107231  | Coronary artery bypass, using arterial graft(s); single arterial graft                                                                                   | 33533.00     | CPT4     | NO | YES | NO |
| 45889898 | Coronary artery bypass, using venous graft(s) and arterial graft(s)                                                                                      | 1006208.00   | CPT4     | NO | YES | NO |
| 2107223  | Coronary artery bypass, using venous graft(s) and arterial graft(s); 2 venous grafts (List separately in addition to code for primary procedure)         | 33518.00     | CPT4     | NO | YES | NO |
| 2107224  | Coronary artery bypass, using venous graft(s) and arterial graft(s); 3 venous grafts (List separately in addition to code for primary procedure)         | 33519.00     | CPT4     | NO | YES | NO |
| 2107226  | Coronary artery bypass, using venous graft(s) and arterial graft(s); 4 venous grafts (List separately in addition to code for primary procedure)         | 33521.00     | CPT4     | NO | YES | NO |
| 2107227  | Coronary artery bypass, using venous graft(s) and arterial graft(s); 5 venous grafts (List separately in addition to code for primary procedure)         | 33522.00     | CPT4     | NO | YES | NO |
| 2107228  | Coronary artery bypass, using venous graft(s) and arterial graft(s); 6 or more venous grafts (List separately in addition to code for primary procedure) | 33523.00     | CPT4     | NO | YES | NO |
| 2107222  | Coronary artery bypass, using venous graft(s) and arterial graft(s); single vein graft (List separately in addition to code for primary procedure)       | 33517.00     | CPT4     | NO | YES | NO |
| 45887862 | Coronary artery bypass, vein only                                                                                                                        | 1006200.00   | CPT4     | NO | YES | NO |
| 2107217  | Coronary artery bypass, vein only; 2 coronary venous grafts                                                                                              | 33511.00     | CPT4     | NO | YES | NO |
| 2107218  | Coronary artery bypass, vein only; 3 coronary venous grafts                                                                                              | 33512.00     | CPT4     | NO | YES | NO |
| 2107219  | Coronary artery bypass, vein only; 4 coronary venous grafts                                                                                              | 33513.00     | CPT4     | NO | YES | NO |
| 2107220  | Coronary artery bypass, vein only; 5 coronary venous grafts                                                                                              | 33514.00     | CPT4     | NO | YES | NO |
| 2107221  | Coronary artery bypass, vein only; 6 or more coronary venous grafts                                                                                      | 33516.00     | CPT4     | NO | YES | NO |
| 2107216  | Coronary artery bypass, vein only; single coronary venous graft                                                                                          | 33510.00     | CPT4     | NO | YES | NO |
| 2001515  | Double internal mammary-coronary artery bypass                                                                                                           | 36.16        | ICD9Proc | NO | YES | NO |
| 4000732  | Internal mammary-coronary artery bypass graft                                                                                                            | 119564002.00 | SNOMED   | NO | YES | NO |
| 2001514  | Single internal mammary-coronary artery bypass                                                                                                           | 36.15        | ICD9Proc | NO | YES | NO |
| 4233420  | Single internal mammary-coronary artery bypass                                                                                                           | 359597003.00 | SNOMED   | NO | YES | NO |
| 45889467 | Venous Grafting Only for Coronary Artery Bypass                                                                                                          | 1006199.00   | CPT4     | NO | YES | NO |





|         |                                        |              |        |    |    |    |
|---------|----------------------------------------|--------------|--------|----|----|----|
| 4020216 | Revision of bypass for coronary artery | 175036008.00 | SNOMED | NO | NO | NO |
| 4305852 | Off-pump coronary artery bypass        | 418824004.00 | SNOMED | NO | NO | NO |

## B.9 Stroke

### B.9.1 Cohort Entry Events

People may enter the cohort when observing any of the following:

1. condition occurrences of '[LEGEND-T2DM] Stroke (ischemic or hemorrhagic)'.

Restrict entry events to having at least 1 visit occurrence of 'Inpatient or ER visit', starting between all days before and 1 days after cohort entry start date and ending between 0 days before and all days after cohort entry start date.

### B.9.2 Cohort Exit

The cohort end date will be offset from index event's start date plus 7 days.

### B.9.3 Cohort Eras

Entry events will be combined into cohort eras if they are within 180 days of each other.

### B.9.4 Concept: Inpatient or ER visit

| Concept ID | Concept Name                       | Code | Vocabulary | Excluded | Descendants | Mapped |
|------------|------------------------------------|------|------------|----------|-------------|--------|
| 262        | Emergency Room and Inpatient Visit | ERIP | Visit      | NO       | YES         | NO     |
| 9203       | Emergency Room Visit               | ER   | Visit      | NO       | YES         | NO     |
| 9201       | Inpatient Visit                    | IP   | Visit      | NO       | YES         | NO     |

### B.9.5 Concept: [LEGEND-T2DM] Stroke (ischemic or hemorrhagic)

| Concept ID | Concept Name              | Code     | Vocabulary | Excluded | Descendants | Mapped |
|------------|---------------------------|----------|------------|----------|-------------|--------|
| 372924     | Cerebral artery occlusion | 20059004 | SNOMED     | NO       | NO          | NO     |
| 375557     | Cerebral embolism         | 75543006 | SNOMED     | NO       | NO          | NO     |



|          |                                     |                 |        |    |     |    |
|----------|-------------------------------------|-----------------|--------|----|-----|----|
| 376713   | Cerebral hemorrhage                 | 274100004       | SNOMED | NO | NO  | NO |
| 443454   | Cerebral infarction                 | 432504007       | SNOMED | NO | YES | NO |
| 441874   | Cerebral thrombosis                 | 71444005        | SNOMED | NO | NO  | NO |
| 439847   | Intracranial hemorrhage             | 1386000         | SNOMED | NO | NO  | NO |
| 432923   | Subarachnoid hemorrhage             | 21454007        | SNOMED | NO | NO  | NO |
| 43530727 | Spontaneous cerebral hemorrhage     | 291571000119106 | SNOMED | NO | NO  | NO |
| 4148906  | Spontaneous subarachnoid hemorrhage | 270907008       | SNOMED | NO | NO  | NO |

## B.10 Sudden cardiac death

### B.10.1 Cohort Entry Events

People may enter the cohort when observing any of the following:

1. condition occurrences of '[LEGEND HTN] Sudden cardiac death'.

Restrict entry events to having at least 1 visit occurrence of 'Inpatient or ER visit', starting anytime on or before cohort entry start date and ending between 0 days before and all days after cohort entry start date.

### B.10.2 Cohort Exit

The cohort end date will be offset from index event's start date plus 7 days.

### B.10.3 Cohort Eras

Entry events will be combined into cohort eras if they are within 180 days of each other.

### B.10.4 Concept: Inpatient or ER visit

| Concept ID | Concept Name                       | Code | Vocabulary | Excluded | Descendants | Mapped |
|------------|------------------------------------|------|------------|----------|-------------|--------|
| 262        | Emergency Room and Inpatient Visit | ERIP | Visit      | NO       | YES         | NO     |
| 9203       | Emergency Room Visit               | ER   | Visit      | NO       | YES         | NO     |
| 9201       | Inpatient Visit                    | IP   | Visit      | NO       | YES         | NO     |

### B.10.5 Concept: [LEGEND HTN] Sudden cardiac death



---

| Concept ID | Concept Name                                       | Code      | Vocabulary | Excluded | Descendants | Mapped |
|------------|----------------------------------------------------|-----------|------------|----------|-------------|--------|
| 4048809    | Brainstem death                                    | 230802007 | SNOMED     | NO       | YES         | NO     |
| 321042     | Cardiac arrest                                     | 410429000 | SNOMED     | NO       | YES         | NO     |
| 442289     | Death in less than 24 hours from onset of symptoms | 53559009  | SNOMED     | NO       | YES         | NO     |
| 4317150    | Sudden cardiac death                               | 95281009  | SNOMED     | NO       | YES         | NO     |
| 4132309    | Sudden death                                       | 26636000  | SNOMED     | NO       | YES         | NO     |
| 437894     | Ventricular fibrillation                           | 71908006  | SNOMED     | YES      | YES         | NO     |

---

## B.11 Abnormal weight gain

### B.11.1 Cohort Entry Events

People enter the cohort when observing any of the following:

1. observations of '[LEGEND HTN] Abnormal weight gain'.

### B.11.2 Cohort Exit

The cohort end date will be offset from index event's start date plus 1 day.

### B.11.3 Cohort Eras

Entry events will be combined into cohort eras if they are within 90 days of each other.

### B.11.4 Concept: [LEGEND HTN] Abnormal weight gain

---

| Concept ID | Concept Name         | Code      | Vocabulary | Excluded | Descendants | Mapped |
|------------|----------------------|-----------|------------|----------|-------------|--------|
| 439141     | Abnormal weight gain | 161833006 | SNOMED     | NO       | YES         | NO     |

---

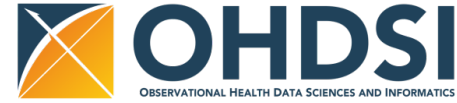

## B.12 Abnormal weight loss

### B.12.1 Cohort Entry Events

People enter the cohort when observing any of the following:

1. observations of '[LEGEND HTN] Abnormal weight loss'.

### B.12.2 Cohort Exit

The cohort end date will be offset from index event's start date plus 1 day.

### B.12.3 Cohort Eras

Entry events will be combined into cohort eras if they are within 90 days of each other.

### B.12.4 Concept: [LEGEND HTN] Abnormal weight loss

| Concept ID | Concept Name             | Code      | Vocabulary | Excluded | Descendants | Mapped |
|------------|--------------------------|-----------|------------|----------|-------------|--------|
| 435928     | Abnormal weight loss     | 267024001 | SNOMED     | NO       | YES         | NO     |
| 40303297   | Weight loss (& abnormal) | 139091004 | SNOMED     | NO       | NO          | NO     |

## B.13 Acute pancreatitis

### B.13.1 Cohort Entry Events

People may enter the cohort when observing any of the following:

1. condition occurrences of '[LEGEND HTN] Acute pancreatitis'.

Restrict entry events to having at least 1 visit occurrence of 'Inpatient or ER visit', starting anytime on or before cohort entry start date and ending between 0 days before and all days after cohort entry start date.

## B.13.2 Cohort Exit

The cohort end date will be offset from index event's start date plus 7 days.

## B.13.3 Cohort Eras

Entry events will be combined into cohort eras if they are within 30 days of each other.

## B.13.4 Concept: Inpatient or ER visit

| Concept ID | Concept Name                       | Code | Vocabulary | Excluded | Descendants | Mapped |
|------------|------------------------------------|------|------------|----------|-------------|--------|
| 262        | Emergency Room and Inpatient Visit | ERIP | Visit      | NO       | YES         | NO     |
| 9203       | Emergency Room Visit               | ER   | Visit      | NO       | YES         | NO     |
| 9201       | Inpatient Visit                    | IP   | Visit      | NO       | YES         | NO     |

## B.13.5 Concept: [LEGEND HTN] Acute pancreatitis

| Concept ID | Concept Name                                                                                                    | Code      | Vocabulary | Excluded | Descendants | Mapped |
|------------|-----------------------------------------------------------------------------------------------------------------|-----------|------------|----------|-------------|--------|
| 199074     | Acute pancreatitis                                                                                              | 197456007 | SNOMED     | NO       | YES         | NO     |
| 2109394    | Placement of drains, peripancreatic, for acute pancreatitis                                                     | 48000     | CPT4       | NO       | NO          | NO     |
| 2109400    | Resection or debridement of pancreas and peripancreatic tissue for acute necrotizing pancreatitis               | 48105     | CPT4       | NO       | NO          | NO     |
| 2109395    | Placement of drains, peripancreatic, for acute pancreatitis; with cholecystostomy, gastrostomy, and jejunostomy | 48001     | CPT4       | NO       | NO          | NO     |
| 42737025   | Resection or debridement of pancreas and peripancreatic tissue for acute necrotizing pancreatitis (Deprecated)  | 48005     | CPT4       | NO       | NO          | NO     |

## B.14 All-cause mortality

### B.14.1 Cohort Entry Events

People enter the cohort when observing any of the following:

1. death of any form.

Limit cohort entry events to the earliest event per person.



---

## B.14.2 Cohort Exit

The person also exists the cohort at the end of continuous observation.

## B.14.3 Cohort Eras

Entry events will be combined into cohort eras if they are within 0 days of each other.

---

## B.15 Bladder cancer

### B.15.1 Cohort Entry Events

People with continuous observation of 365 days before event enter the cohort when observing any of the following:

1. condition occurrence of 'Bladder cancer' for the first time in the person's history.

Limit cohort entry events to the earliest event per person.

### B.15.2 Cohort Exit

The person also exists the cohort at the end of continuous observation.

### B.15.3 Cohort Eras

Entry events will be combined into cohort eras if they are within 0 days of each other.

### B.15.4 Concept: Bladder cancer

---

| Concept ID | Concept Name                       | Code      | Vocabulary | Excluded | Descendants | Mapped |
|------------|------------------------------------|-----------|------------|----------|-------------|--------|
| 197508     | Malignant tumor of urinary bladder | 399326009 | SNOMED     | NO       | YES         | NO     |

---



---

## B.16 Bone fracture

### B.16.1 Cohort Entry Events

People enter the cohort when observing any of the following:

1. condition occurrences of 'Bone fracture'.

### B.16.2 Cohort Exit

The cohort end date will be offset from index event's start date plus 1 day.

### B.16.3 Cohort Eras

Entry events will be combined into cohort eras if they are within 90 days of each other.

### B.16.4 Concept: Bone fracture

| Concept ID | Concept Name                                      | Code      | Vocabulary | Excluded | Descendants | Mapped |
|------------|---------------------------------------------------|-----------|------------|----------|-------------|--------|
| 75053      | Fracture of bone                                  | 125605004 | SNOMED     | NO       | YES         | NO     |
| 4071354    | Open reduction of fracture with internal fixation | 20701002  | SNOMED     | NO       | YES         | NO     |

---

## B.17 Breast cancer

### B.17.1 Cohort Entry Events

People with continuous observation of 365 days before event enter the cohort when observing any of the following:

1. condition occurrence of 'Malignant tumor of breast' for the first time in the person's history.

Limit cohort entry events to the earliest event per person.



## B.17.2 Cohort Exit

The person also exists the cohort at the end of continuous observation.

## B.17.3 Cohort Eras

Entry events will be combined into cohort eras if they are within 0 days of each other.

## B.17.4 Concept: Malignant tumor of breast

| Concept ID | Concept Name              | Code      | Vocabulary | Excluded | Descendants | Mapped |
|------------|---------------------------|-----------|------------|----------|-------------|--------|
| 4112853    | Malignant tumor of breast | 254837009 | SNOMED     | NO       | YES         | NO     |

## B.18 Diabetic ketoacidosis

### B.18.1 Cohort Entry Events

People may enter the cohort when observing any of the following:

1. condition occurrences of 'Diabetic ketoacidosis'.

Restrict entry events to having at least 1 visit occurrence of 'Inpatient or ER visit', starting between all days before and 1 days after cohort entry start date and ending between 0 days before and all days after cohort entry start date.

### B.18.2 Cohort Exit

The cohort end date will be offset from index event's start date plus 7 days.

### B.18.3 Cohort Eras

Entry events will be combined into cohort eras if they are within 180 days of each other.





## B.18.4 Concept: Inpatient or ER visit

| Concept ID | Concept Name                       | Code | Vocabulary | Excluded | Descendants | Mapped |
|------------|------------------------------------|------|------------|----------|-------------|--------|
| 262        | Emergency Room and Inpatient Visit | ERIP | Visit      | NO       | YES         | NO     |
| 9203       | Emergency Room Visit               | ER   | Visit      | NO       | YES         | NO     |
| 9201       | Inpatient Visit                    | IP   | Visit      | NO       | YES         | NO     |

## B.18.5 Concept: Diabetic ketoacidosis

| Concept ID | Concept Name          | Code      | Vocabulary | Excluded | Descendants | Mapped |
|------------|-----------------------|-----------|------------|----------|-------------|--------|
| 443727     | Diabetic ketoacidosis | 420422005 | SNOMED     | NO       | YES         | NO     |

## B.19 Diarrhea

### B.19.1 Cohort Entry Events

People enter the cohort when observing any of the following:

1. condition occurrences of '[LEGEND HTN} Diarrhea'.

### B.19.2 Cohort Exit

The cohort end date will be offset from index event's start date plus 1 day.

### B.19.3 Cohort Eras

Entry events will be combined into cohort eras if they are within 30 days of each other.

### B.19.4 Concept: [LEGEND HTN} Diarrhea

| Concept ID | Concept Name                 | Code      | Vocabulary | Excluded | Descendants | Mapped |
|------------|------------------------------|-----------|------------|----------|-------------|--------|
| 196523     | Diarrhea                     | 62315008  | SNOMED     | NO       | YES         | NO     |
| 4134607    | Diarrheal disorder           | 128333008 | SNOMED     | NO       | YES         | NO     |
| 201773     | Enteritis of small intestine | 64613007  | SNOMED     | NO       | NO          | NO     |
| 80141      | Functional diarrhea          | 47812002  | SNOMED     | NO       | YES         | NO     |



|         |                         |          |        |    |     |    |
|---------|-------------------------|----------|--------|----|-----|----|
| 4207688 | Infectious enteritis    | 55184003 | SNOMED | NO | NO  | NO |
| 4324838 | Noninfectious enteritis | 71207007 | SNOMED | NO | NO  | NO |
| 197596  | Toxic gastroenteritis   | 71583005 | SNOMED | NO | YES | NO |
| 196620  | Viral enteritis         | 78420004 | SNOMED | NO | YES | NO |

## B.20 Genitourinary infection

### B.20.1 Cohort Entry Events

People enter the cohort when observing any of the following:

1. condition occurrences of 'UTI'.

Limit qualifying entry events to the earliest event per person.

### B.20.2 Cohort Exit

The cohort end date will be offset from index event's start date plus 1 day.

### B.20.3 Cohort Eras

Entry events will be combined into cohort eras if they are within 30 days of each other.

### B.20.4 Concept: UTI

| Concept ID | Concept Name                               | Code           | Vocabulary | Excluded | Descendants | Mapped |
|------------|--------------------------------------------|----------------|------------|----------|-------------|--------|
| 81902      | Urinary tract infectious disease           | 6.85660050e+07 | SNOMED     | NO       | YES         | NO     |
| 4167328    | Pyuria                                     | 4.80000100e+06 | SNOMED     | NO       | YES         | NO     |
| 77340      | Genitourinary tract infection in pregnancy | 2.67204006e+08 | SNOMED     | NO       | YES         | NO     |
| 4265485    | Bacteriuria                                | 6.13730060e+07 | SNOMED     | NO       | YES         | NO     |
| 4126297    | Chronic obstructive pyelonephritis         | 2.36379002e+08 | SNOMED     | NO       | YES         | NO     |
| 195588     | Cystitis                                   | 3.88220070e+07 | SNOMED     | NO       | YES         | NO     |
| 198806     | Abscess of prostate                        | 8.72500500e+06 | SNOMED     | YES      | YES         | NO     |
| 4126267    | Chronic radiation cystitis                 | 2.36629009e+08 | SNOMED     | YES      | YES         | NO     |
| 194997     | Prostatitis                                | 9.71300200e+06 | SNOMED     | YES      | NO          | NO     |
| 4077499    | Sterile pyuria                             | 2.75742001e+08 | SNOMED     | YES      | YES         | NO     |
| 442345     | Syphilis of kidney                         | 5.95300010e+07 | SNOMED     | YES      | YES         | NO     |
| 4062493    | Mumps nephritis                            | 1.71210060e+07 | SNOMED     | YES      | YES         | NO     |
| 45757237   | Diphtheria tubulointerstitial nephropathy  | 1.08607100e+15 | SNOMED     | YES      | YES         | NO     |
| 36714969   | Asymptomatic bacteriuria                   | 7.20406004e+08 | SNOMED     | YES      | YES         | NO     |



|          |                                           |                |        |     |     |    |
|----------|-------------------------------------------|----------------|--------|-----|-----|----|
| 195743   | Diphtheritic cystitis                     | 4.82780010e+07 | SNOMED | YES | YES | NO |
| 201353   | Irradiation cystitis                      | 1.12510000e+07 | SNOMED | YES | YES | NO |
| 4047937  | Neonatal urinary tract infection          | 1.23010090e+07 | SNOMED | YES | YES | NO |
| 201792   | Nongonococcal urethritis                  | 8.46190010e+07 | SNOMED | YES | YES | NO |
| 4128384  | Non-infective cystitis                    | 2.36623005e+08 | SNOMED | YES | NO  | NO |
| 78357    | Reactive arthritis triad                  | 6.72240070e+07 | SNOMED | YES | YES | NO |
| 195313   | Urethral abscess                          | 6.72770020e+07 | SNOMED | YES | YES | NO |
| 197919   | Urethral stricture due to infection       | 8.03750020e+07 | SNOMED | YES | YES | NO |
| 439349   | Cystitis associated with another disorder | 1.97845000e+08 | SNOMED | YES | NO  | NO |
| 4227291  | Hemorrhagic cystitis                      | 8.76960040e+07 | SNOMED | YES | NO  | NO |
| 4060312  | Infections of urethra in pregnancy        | 1.99206009e+08 | SNOMED | YES | NO  | NO |
| 4127564  | Acute cystitis - culture-negative         | 2.36624004e+08 | SNOMED | YES | YES | NO |
| 4126141  | Chronic cystitis - culture negative       | 2.36626002e+08 | SNOMED | YES | NO  | NO |
| 4127565  | Recurrent cystitis - culture-negative     | 2.36625003e+08 | SNOMED | YES | YES | NO |
| 4207186  | Viral infection by site                   | 3.12130009e+08 | SNOMED | YES | YES | NO |
| 4207190  | Fungal infection by site                  | 3.12146001e+08 | SNOMED | YES | YES | NO |
| 434557   | Tuberculosis                              | 5.67170010e+07 | SNOMED | YES | YES | NO |
| 432251   | Disease caused by parasite                | 1.73220070e+07 | SNOMED | YES | YES | NO |
| 36102152 | Protozoal infectious disorders            | 1.00370720e+07 | MedDRA | YES | YES | NO |
| 433417   | Gonorrhea                                 | 1.56280030e+07 | SNOMED | YES | YES | NO |
| 36102938 | Chlamydial infections                     | 1.00085610e+07 | MedDRA | YES | YES | NO |

## B.21 Hyperkalemia

### B.21.1 Cohort Entry Events

People enter the cohort when observing any of the following:

1. condition occurrences of '[LEGEND HTN] Hyperkalemia'.
2. measurements of '[LEGEND HTN] Potassium measurement', numeric value > 5.6; unit: "millimole per liter".

### B.21.2 Cohort Exit

The cohort end date will be offset from index event's start date plus 1 day.

### B.21.3 Cohort Eras

Entry events will be combined into cohort eras if they are within 90 days of each other.



### B.21.4 Concept: [LEGEND HTN] Hyperkalemia

| Concept ID | Concept Name | Code     | Vocabulary | Excluded | Descendants | Mapped |
|------------|--------------|----------|------------|----------|-------------|--------|
| 434610     | Hyperkalemia | 14140009 | SNOMED     | NO       | YES         | NO     |

### B.21.5 Concept: [LEGEND HTN] Potassium measurement

| Concept ID | Concept Name              | Code         | Vocabulary | Excluded | Descendants | Mapped |
|------------|---------------------------|--------------|------------|----------|-------------|--------|
| 40789890   | Potassium                 | Bld-Ser-Plas | LP42189-8  | LOINC    | NO          | YES    |
| 4245152    | Potassium measurement     | 59573005     | SNOMED     | NO       | YES         | NO     |
| 4276440    | Potassium level - finding | 365760004    | SNOMED     | NO       | YES         | NO     |

## B.22 Hypoglycemia

### B.22.1 Cohort Entry Events

People enter the cohort when observing any of the following:

1. condition occurrences of 'Hypoglycemia'.

### B.22.2 Cohort Exit

The cohort end date will be offset from index event's start date plus 1 day.

### B.22.3 Cohort Eras

Entry events will be combined into cohort eras if they are within 30 days of each other.

### B.22.4 Concept: Hypoglycemia

| Concept ID | Concept Name                                      | Code      | Vocabulary | Excluded | Descendants | Mapped |
|------------|---------------------------------------------------|-----------|------------|----------|-------------|--------|
| 380688     | Hypoglycemic coma                                 | 267384006 | SNOMED     | NO       | YES         | NO     |
| 4048805    | Non-diabetic hypoglycemic coma                    | 230796005 | SNOMED     | YES      | YES         | NO     |
| 4226798    | Hypoglycemic coma due to diabetes mellitus        | 421725003 | SNOMED     | NO       | YES         | NO     |
| 4228112    | Hypoglycemic coma due to type 1 diabetes mellitus | 421437000 | SNOMED     | YES      | YES         | NO     |



|          |                                                   |                 |        |     |     |    |
|----------|---------------------------------------------------|-----------------|--------|-----|-----|----|
| 36714116 | Hypoglycemic coma due to type 2 diabetes mellitus | 719216001       | SNOMED | NO  | YES | NO |
| 24609    | Hypoglycemia                                      | 302866003       | SNOMED | NO  | YES | NO |
| 23034    | Neonatal hypoglycemia                             | 52767006        | SNOMED | YES | YES | NO |
| 4029424  | Non-diabetic hypoglycemia                         | 237637005       | SNOMED | YES | YES | NO |
| 4029423  | Hypoglycemia due to diabetes mellitus             | 237633009       | SNOMED | NO  | YES | NO |
| 45769876 | Hypoglycemia due to type 1 diabetes mellitus      | 84371000119108  | SNOMED | YES | YES | NO |
| 45757363 | Hypoglycemia due to type 2 diabetes mellitus      | 120731000119103 | SNOMED | NO  | YES | NO |
| 4096804  | Drug-induced hypoglycemia without coma            | 190448007       | SNOMED | NO  | YES | NO |

## B.23 Hypotension

### B.23.1 Cohort Entry Events

People enter the cohort when observing any of the following:

1. condition occurrences of '[LEGEND HTN] Hypotension'.

### B.23.2 Cohort Exit

The cohort end date will be offset from index event's start date plus 1 day.

### B.23.3 Cohort Eras

Entry events will be combined into cohort eras if they are within 90 days of each other.

### B.23.4 Concept: [LEGEND HTN] Hypotension

| Concept ID | Concept Name                        | Code      | Vocabulary | Excluded | Descendants | Mapped |
|------------|-------------------------------------|-----------|------------|----------|-------------|--------|
| 313232     | Hemodialysis-associated hypotension | 408667000 | SNOMED     | YES      | YES         | NO     |
| 317002     | Low blood pressure                  | 45007003  | SNOMED     | NO       | YES         | NO     |
| 314432     | Maternal hypotension syndrome       | 88887003  | SNOMED     | YES      | YES         | NO     |



## B.24 Joint pain

### B.24.1 Cohort Entry Events

People enter the cohort when observing any of the following:

1. condition occurrences of 'Joint pain'.

### B.24.2 Cohort Exit

The cohort end date will be offset from index event's start date plus 1 day.

### B.24.3 Cohort Eras

Entry events will be combined into cohort eras if they are within 90 days of each other.

### B.24.4 Concept: Joint pain

| Concept ID | Concept Name | Code     | Vocabulary | Excluded | Descendants | Mapped |
|------------|--------------|----------|------------|----------|-------------|--------|
| 77074      | Joint pain   | 57676002 | SNOMED     | NO       | NO          | NO     |

## B.25 Lower extremity amputation

### B.25.1 Cohort Entry Events

People may enter the cohort when observing any of the following:

1. procedure occurrences of 'below-knee amputations'.

Restrict entry events to having no procedure occurrences of 'below-knee amputations', starting in the 30 days prior to cohort entry start date.

### B.25.2 Cohort Exit

The cohort end date will be offset from index event's start date plus 0 days.



## B.25.3 Cohort Eras

Entry events will be combined into cohort eras if they are within 0 days of each other.

## B.25.4 Concept: below-knee amputations

| Concept ID | Concept Name                                                                                                                               | Code         | Vocabulary | Excluded | Descendants | Mapped |
|------------|--------------------------------------------------------------------------------------------------------------------------------------------|--------------|------------|----------|-------------|--------|
| 4264289    | Amputation of ankle                                                                                                                        | 397218006.00 | SNOMED     | NO       | YES         | NO     |
| 2006242    | Amputation of ankle through malleoli of tibia and fibula                                                                                   | 84.14        | ICD9Proc   | NO       | YES         | NO     |
| 2105446    | Amputation, leg, through tibia and fibula                                                                                                  | 27880.00     | CPT4       | NO       | YES         | NO     |
| 2105804    | Amputation, foot; midtarsal (eg, Chopart type procedure)                                                                                   | 28800.00     | CPT4       | NO       | YES         | NO     |
| 2105805    | Amputation, foot; transmetatarsal                                                                                                          | 28805.00     | CPT4       | NO       | YES         | NO     |
| 2105806    | Amputation, metatarsal, with toe, single                                                                                                   | 28810.00     | CPT4       | NO       | YES         | NO     |
| 2105807    | Amputation, toe; metatarsophalangeal joint                                                                                                 | 28820.00     | CPT4       | NO       | YES         | NO     |
| 2105808    | Amputation, toe; interphalangeal joint                                                                                                     | 28825.00     | CPT4       | NO       | YES         | NO     |
| 2105451    | Amputation, ankle, through malleoli of tibia and fibula (eg, Syme, Pirogoff type procedures), with plastic closure and resection of nerves | 27888.00     | CPT4       | NO       | YES         | NO     |
| 2105447    | Amputation, leg, through tibia and fibula; with immediate fitting technique including application of first cast                            | 27881.00     | CPT4       | NO       | YES         | NO     |
| 4338257    | Amputation of leg through tibia and fibula                                                                                                 | 88312006.00  | SNOMED     | NO       | YES         | NO     |
| 2105448    | Amputation, leg, through tibia and fibula; open, circular (guillotine)                                                                     | 27882.00     | CPT4       | NO       | YES         | NO     |
| 4108565    | Amputation of the foot                                                                                                                     | 180030006.00 | SNOMED     | NO       | YES         | NO     |
| 2006229    | Amputation of toe                                                                                                                          | 84.11        | ICD9Proc   | NO       | YES         | NO     |
| 4159766    | Amputation of toe                                                                                                                          | 371186005.00 | SNOMED     | NO       | YES         | NO     |
| 4054983    | Amputation through foot                                                                                                                    | 211570009.00 | SNOMED     | NO       | YES         | NO     |
| 2006230    | Amputation through foot                                                                                                                    | 84.12        | ICD9Proc   | NO       | YES         | NO     |
| 4143797    | Amputation through metatarsal bones                                                                                                        | 265739006.00 | SNOMED     | NO       | YES         | NO     |
| 2105450    | Amputation, leg, through tibia and fibula; re-amputation                                                                                   | 27886.00     | CPT4       | NO       | YES         | NO     |
| 2006231    | Disarticulation of ankle                                                                                                                   | 84.13        | ICD9Proc   | NO       | YES         | NO     |
| 2006244    | Disarticulation of knee                                                                                                                    | 84.16        | ICD9Proc   | NO       | YES         | NO     |
| 4018719    | Midtarsal amputation of foot                                                                                                               | 209724005.00 | SNOMED     | NO       | YES         | NO     |
| 2006243    | Other amputation below knee                                                                                                                | 84.15        | ICD9Proc   | NO       | YES         | NO     |
| 2105449    | Amputation, leg, through tibia and fibula; secondary closure or scar revision                                                              | 27884.00     | CPT4       | YES      | YES         | NO     |
| 4219032    | Amputation of lower limb                                                                                                                   | 397117006.00 | SNOMED     | NO       | YES         | NO     |

## B.26 Nausea

### B.26.1 Cohort Entry Events

People enter the cohort when observing any of the following:



1. condition occurrences of '[LEGEND HTN] Nausea'.

## **B.26.2 Cohort Exit**

The cohort end date will be offset from index event's start date plus 1 day.

## **B.26.3 Cohort Eras**

Entry events will be combined into cohort eras if they are within 30 days of each other.

## **B.26.4 Concept: [LEGEND HTN] Nausea**

| Concept ID | Concept Name    | Code      | Vocabulary | Excluded | Descendants | Mapped |
|------------|-----------------|-----------|------------|----------|-------------|--------|
| 30284      | Motion sickness | 37031009  | SNOMED     | YES      | YES         | NO     |
| 31967      | Nausea          | 422587007 | SNOMED     | NO       | YES         | NO     |

## **B.27 Peripheral edema**

### **B.27.1 Cohort Entry Events**

People enter the cohort when observing any of the following:

1. condition occurrences of 'Edema'.

### **B.27.2 Cohort Exit**

The cohort end date will be offset from index event's start date plus 1 day.

### **B.27.3 Cohort Eras**

Entry events will be combined into cohort eras if they are within 180 days of each other.



## B.27.4 Concept: Edema

| Concept ID | Concept Name     | Code      | Vocabulary | Excluded | Descendants | Mapped |
|------------|------------------|-----------|------------|----------|-------------|--------|
| 433595     | Edema            | 267038008 | SNOMED     | NO       | YES         | NO     |
| 133299     | Swelling of limb | 80068009  | SNOMED     | NO       | YES         | NO     |

## B.28 Photosensitivity

### B.28.1 Cohort Entry Events

People enter the cohort when observing any of the following:

1. condition occurrences of 'Photosensitivity'.

### B.28.2 Cohort Exit

The cohort end date will be offset from index event's start date plus 1 day.

### B.28.3 Cohort Eras

Entry events will be combined into cohort eras if they are within 90 days of each other.

### B.28.4 Concept: Photosensitivity

| Concept ID | Concept Name                                   | Code      | Vocabulary | Excluded | Descendants | Mapped |
|------------|------------------------------------------------|-----------|------------|----------|-------------|--------|
| 4300445    | Acantholytic actinic keratosis                 | 403199007 | SNOMED     | YES      | NO          | NO     |
| 4263325    | Actinic cheilitis                              | 46795000  | SNOMED     | YES      | NO          | NO     |
| 4031007    | Actinic folliculitis                           | 238529007 | SNOMED     | YES      | NO          | NO     |
| 442179     | Actinic granuloma                              | 79144000  | SNOMED     | YES      | NO          | NO     |
| 37312586   | Actinic intraepidermal squamous cell carcinoma | 789051005 | SNOMED     | YES      | NO          | NO     |
| 138825     | Actinic keratosis                              | 201101007 | SNOMED     | YES      | NO          | NO     |
| 4304266    | Actinic keratosis of eyelid                    | 418686001 | SNOMED     | YES      | NO          | NO     |
| 4064057    | Actinic lichen planus                          | 200999007 | SNOMED     | YES      | NO          | NO     |
| 141374     | Actinic prurigo                                | 201015007 | SNOMED     | YES      | NO          | NO     |
| 4031006    | Actinic reaction                               | 238528004 | SNOMED     | YES      | NO          | NO     |
| 439096     | Actinic reticuloid                             | 52636001  | SNOMED     | YES      | NO          | NO     |
| 4070156    | Acute actinic otitis externa                   | 21543000  | SNOMED     | YES      | NO          | NO     |

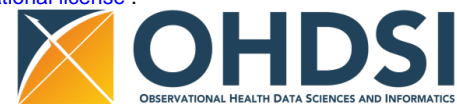

|          |                                                                                   |           |        |     |     |    |
|----------|-----------------------------------------------------------------------------------|-----------|--------|-----|-----|----|
| 4290728  | Acute effect of ultraviolet radiation on normal skin                              | 402165001 | SNOMED | YES | NO  | NO |
| 4241471  | Acute phytophotodermatitis                                                        | 58306008  | SNOMED | YES | NO  | NO |
| 36674412 | Ataxia, photosensitivity, short stature syndrome                                  | 773769008 | SNOMED | YES | NO  | NO |
| 4293437  | Atrophic actinic keratosis                                                        | 403200005 | SNOMED | YES | NO  | NO |
| 4066470  | Berloque dermatitis                                                               | 200836002 | SNOMED | YES | NO  | NO |
| 4119822  | Bowenoid actinic keratosis                                                        | 304524009 | SNOMED | YES | NO  | NO |
| 4033832  | Brachioradial summer pruritus                                                     | 109252001 | SNOMED | YES | NO  | NO |
| 37116482 | Burn of skin caused by exposure to artificial source of ultraviolet radiation     | 733209003 | SNOMED | YES | NO  | NO |
| 37116483 | Burn of skin caused by ultraviolet radiation due to ultraviolet light therapy     | 733210008 | SNOMED | YES | NO  | NO |
| 4290729  | Chronic effect of ultraviolet radiation on normal skin (photo-aging)              | 402166000 | SNOMED | YES | NO  | NO |
| 4239682  | Chronic phototoxic dermatitis                                                     | 69231004  | SNOMED | YES | NO  | NO |
| 4242265  | Chronic phytophotodermatitis                                                      | 58419006  | SNOMED | YES | NO  | NO |
| 36715275 | Cutaneous photosensitivity and lethal colitis syndrome                            | 720820000 | SNOMED | YES | NO  | NO |
| 4230340  | Cutis rhomboidalis nuchae                                                         | 89019003  | SNOMED | YES | NO  | NO |
| 4300796  | Diffuse actinic hyperkeratosis                                                    | 403208003 | SNOMED | YES | NO  | NO |
| 141650   | Disseminated superficial actinic porokeratosis                                    | 41495000  | SNOMED | YES | NO  | NO |
| 4301164  | Drug-induced pellagra                                                             | 403626007 | SNOMED | YES | NO  | NO |
| 4299673  | Familial actinic prurigo of lip                                                   | 403210001 | SNOMED | YES | NO  | NO |
| 4234867  | Food-induced photosensitivity                                                     | 90386003  | SNOMED | YES | NO  | NO |
| 36715367 | Hair defect with photosensitivity and intellectual disability syndrome            | 721007005 | SNOMED | YES | NO  | NO |
| 4308081  | Hydroa vacciniforme                                                               | 200837006 | SNOMED | YES | NO  | NO |
| 42709861 | Hyperkeratotic actinic keratosis                                                  | 449733007 | SNOMED | YES | NO  | NO |
| 4112749  | Hypertrophic solar keratosis                                                      | 254667001 | SNOMED | YES | NO  | NO |
| 4300444  | Idiopathic photo-onycholysis                                                      | 403196000 | SNOMED | YES | NO  | NO |
| 4031005  | Juvenile spring eruption                                                          | 238526000 | SNOMED | YES | NO  | NO |
| 4116197  | Lentigo maligna                                                                   | 302836005 | SNOMED | YES | NO  | NO |
| 4299672  | Lichenoid actinic keratosis                                                       | 403198004 | SNOMED | YES | NO  | NO |
| 4080922  | Light - exacerbated acne                                                          | 238530002 | SNOMED | YES | NO  | NO |
| 4293560  | Multiple actinic keratoses                                                        | 403202002 | SNOMED | YES | NO  | NO |
| 4293562  | Multiple actinic keratoses involving face                                         | 403204001 | SNOMED | YES | NO  | NO |
| 4300794  | Multiple actinic keratoses involving forehead and temples                         | 403205000 | SNOMED | YES | NO  | NO |
| 4300795  | Multiple actinic keratoses involving hands                                        | 403206004 | SNOMED | YES | NO  | NO |
| 4293563  | Multiple actinic keratoses involving legs                                         | 403207008 | SNOMED | YES | NO  | NO |
| 4293561  | Multiple actinic keratoses involving scalp                                        | 403203007 | SNOMED | YES | NO  | NO |
| 37110331 | Neonatal burn due to phototherapy caused by ultraviolet radiation                 | 724551009 | SNOMED | YES | NO  | NO |
| 4006157  | Nodular elastosis with cysts and comedones                                        | 111200005 | SNOMED | YES | NO  | NO |
| 37110590 | Occupational phototoxic reaction to skin contact with exogenous photoactive agent | 724873006 | SNOMED | YES | NO  | NO |
| 4292224  | Photoaggravated psoriasis                                                         | 402318000 | SNOMED | YES | NO  | NO |
| 4293593  | Photoaggravated rosacea                                                           | 403365004 | SNOMED | YES | NO  | NO |
| 4290732  | Photoaggravation of disorder                                                      | 402179009 | SNOMED | YES | NO  | NO |
| 42537710 | Photodermatitis co-occurrent and due to autoimmune disease                        | 737249005 | SNOMED | YES | NO  | NO |
| 4318376  | Photoonycholysis                                                                  | 95342006  | SNOMED | YES | NO  | NO |
| 4234104  | Photosensitivity                                                                  | 90128006  | SNOMED | NO  | YES | NO |
| 42537712 | Phototoxic reaction of skin caused by cosmetic                                    | 737251009 | SNOMED | YES | NO  | NO |
| 42537711 | Phototoxic reaction of skin caused by fragrance                                   | 737250005 | SNOMED | YES | NO  | NO |
| 4290730  | Phototoxic reaction to dye                                                        | 402174004 | SNOMED | YES | NO  | NO |
| 4298594  | Phototoxic reaction to tar or derivative                                          | 402175003 | SNOMED | YES | NO  | NO |



|          |                                                             |           |        |     |    |    |
|----------|-------------------------------------------------------------|-----------|--------|-----|----|----|
| 4298593  | Phototoxic reaction to topical chemical                     | 402173005 | SNOMED | YES | NO | NO |
| 4270722  | Phototoxic reaction to topically applied medicament         | 402176002 | SNOMED | YES | NO | NO |
| 42539382 | Pigmentation of skin caused by artificial ultraviolet light | 762664003 | SNOMED | YES | NO | NO |
| 42709860 | Pigmented actinic keratosis                                 | 449732002 | SNOMED | YES | NO | NO |
| 4080921  | Polymorphous light eruption                                 | 238525001 | SNOMED | YES | NO | NO |
| 4176424  | Polymorphous light eruption, diffuse erythematous type      | 51048002  | SNOMED | YES | NO | NO |
| 4223992  | Polymorphous light eruption, eczematous type                | 84036008  | SNOMED | YES | NO | NO |
| 4204365  | Polymorphous light eruption, papular type                   | 54116000  | SNOMED | YES | NO | NO |
| 4195589  | Polymorphous light eruption, papulovesicular type           | 79372000  | SNOMED | YES | NO | NO |
| 4278846  | Polymorphous light eruption, plaque type                    | 6618004   | SNOMED | YES | NO | NO |
| 4297664  | Porphyria-induced phototoxic burn                           | 402480004 | SNOMED | YES | NO | NO |
| 4296207  | Proliferative actinic keratosis                             | 403201009 | SNOMED | YES | NO | NO |
| 4066838  | Pruritus estivalis                                          | 201024003 | SNOMED | YES | NO | NO |
| 4031625  | Solar comedone                                              | 238518008 | SNOMED | YES | NO | NO |
| 4185267  | Solar degeneration                                          | 43982006  | SNOMED | YES | NO | NO |
| 4031162  | Solar lentiginosis                                          | 238712007 | SNOMED | YES | NO | NO |
| 4217502  | Solar lentigo                                               | 72100002  | SNOMED | YES | NO | NO |
| 4296189  | Solar pruritus                                              | 402177006 | SNOMED | YES | NO | NO |
| 4033831  | Solar pruritus of elbows                                    | 109251008 | SNOMED | YES | NO | NO |
| 4031004  | Strimmer dermatitis                                         | 238522003 | SNOMED | YES | NO | NO |
| 4296206  | Sun-induced wrinkles                                        | 403197009 | SNOMED | YES | NO | NO |

## B.29 Renal cancer

### B.29.1 Cohort Entry Events

People with continuous observation of 365 days before event enter the cohort when observing any of the following:

1. condition occurrence of 'Primary malignant neoplasm of kidney' for the first time in the person's history.

Limit cohort entry events to the earliest event per person.

### B.29.2 Cohort Exit

The person also exists the cohort at the end of continuous observation.

### B.29.3 Cohort Eras

Entry events will be combined into cohort eras if they are within 0 days of each other.



## B.29.4 Concept: Primary malignant neoplasm of kidney

| Concept ID | Concept Name                         | Code     | Vocabulary | Excluded | Descendants | Mapped |
|------------|--------------------------------------|----------|------------|----------|-------------|--------|
| 198985     | Primary malignant neoplasm of kidney | 93849006 | SNOMED     | NO       | YES         | NO     |
| 4215373    | Renal cell carcinoma                 | 41607009 | SNOMED     | NO       | NO          | NO     |

## B.30 Thyroid tumor

### B.30.1 Cohort Entry Events

People with continuous observation of 365 days before event enter the cohort when observing any of the following:

1. condition occurrence of 'Neoplasm of thyroid gland' for the first time in the person's history.

Limit cohort entry events to the earliest event per person.

### B.30.2 Cohort Exit

The person also exists the cohort at the end of continuous observation.

### B.30.3 Cohort Eras

Entry events will be combined into cohort eras if they are within 0 days of each other.

### B.30.4 Concept: Neoplasm of thyroid gland

| Concept ID | Concept Name              | Code      | Vocabulary | Excluded | Descendants | Mapped |
|------------|---------------------------|-----------|------------|----------|-------------|--------|
| 4131909    | Neoplasm of thyroid gland | 127018007 | SNOMED     | NO       | YES         | NO     |



## B.31 Venous thromboembolism

### B.31.1 Cohort Entry Events

People enter the cohort when observing any of the following:

1. condition occurrences of '[LEGEND HTN] Venous thromboembolism (pulmonary embolism and deep vein thrombosis)'.

### B.31.2 Cohort Exit

The cohort end date will be offset from index event's start date plus 1 day.

### B.31.3 Cohort Eras

Entry events will be combined into cohort eras if they are within 180 days of each other.

### B.31.4 Concept: [LEGEND HTN] Venous thromboembolism (pulmonary embolism and deep vein thrombosis)

| Concept ID | Concept Name                                                  | Code        | Vocabulary | Excluded | Descendants | Mapped |
|------------|---------------------------------------------------------------|-------------|------------|----------|-------------|--------|
| 435616     | Amniotic fluid embolism                                       | 17263003.0  | SNOMED     | YES      | YES         | NO     |
| 435887     | Antepartum deep vein thrombosis                               | 49956009.0  | SNOMED     | YES      | YES         | NO     |
| 196715     | Budd-Chiari syndrome                                          | 82385007.0  | SNOMED     | YES      | YES         | NO     |
| 4062269    | Cerebral venous thrombosis in pregnancy                       | 200259003.0 | SNOMED     | YES      | YES         | NO     |
| 442055     | Obstetric air pulmonary embolism                              | 200286003.0 | SNOMED     | YES      | YES         | NO     |
| 433832     | Obstetric blood-clot pulmonary embolism                       | 200299000.0 | SNOMED     | YES      | YES         | NO     |
| 435026     | Obstetric pulmonary embolism                                  | 200284000.0 | SNOMED     | YES      | YES         | NO     |
| 440477     | Obstetric pyemic and septic pulmonary embolism                | 267284008.0 | SNOMED     | YES      | YES         | NO     |
| 318137     | Phlebitis and thrombophlebitis of intracranial sinuses        | 192753009.0 | SNOMED     | YES      | YES         | NO     |
| 199837     | Portal vein thrombosis                                        | 17920008.0  | SNOMED     | YES      | YES         | NO     |
| 438820     | Postpartum deep phlebothrombosis                              | 56272000.0  | SNOMED     | YES      | YES         | NO     |
| 440417     | Pulmonary embolism                                            | 59282003.0  | SNOMED     | NO       | YES         | NO     |
| 254662     | Pulmonary infarction                                          | 64662007.0  | SNOMED     | NO       | YES         | NO     |
| 4235812    | Septic thrombophlebitis                                       | 439731006.0 | SNOMED     | YES      | YES         | NO     |
| 195294     | Thrombosed hemorrhoids                                        | 75955007.0  | SNOMED     | YES      | YES         | NO     |
| 4187790    | Thrombosis of retinal vein                                    | 46085004.0  | SNOMED     | YES      | YES         | NO     |
| 444247     | Venous thrombosis                                             | 111293003.0 | SNOMED     | NO       | YES         | NO     |
| 44834756   | Acute venous embolism and thrombosis of other specified veins | 453.8       | ICD9CM     | NO       | NO          | NO     |



## B.32 Vomiting

### B.32.1 Cohort Entry Events

People enter the cohort when observing any of the following:

1. condition occurrences of '[LEGEND HTN] Vomiting'.

### B.32.2 Cohort Exit

The cohort end date will be offset from index event's start date plus 1 day.

### B.32.3 Cohort Eras

Entry events will be combined into cohort eras if they are within 30 days of each other.

### B.32.4 Concept: [LEGEND HTN] Vomiting

| Concept ID | Concept Name           | Code      | Vocabulary | Excluded | Descendants | Mapped |
|------------|------------------------|-----------|------------|----------|-------------|--------|
| 40480290   | Hyperemesis            | 444673007 | SNOMED     | YES      | YES         | NO     |
| 4216862    | Postoperative vomiting | 72245005  | SNOMED     | YES      | YES         | NO     |
| 441408     | Vomiting               | 422400008 | SNOMED     | NO       | YES         | NO     |
| 440785     | Vomiting of pregnancy  | 90325002  | SNOMED     | YES      | YES         | NO     |

## C Negative Control Concepts

Table 72: Negative outcome controls specified through condition occurrences that map to (a descendent of) the indicated concept ID

|                                                          | Concept ID |
|----------------------------------------------------------|------------|
| Abnormal posture                                         | 439935     |
| Abnormal pupil                                           | 436409     |
| Abrasion and/or friction burn of multiple sites          | 443585     |
| Abrasion and/or friction burn of trunk without infection | 199192     |
| Absence of breast                                        | 4088290    |
| Absent kidney                                            | 4092879    |

(Continued on Next Page...)



Table 72: Negative outcome controls specified through condition occurrences that map to (a descendent of) the indicated concept ID (*continued*)

|                                         | Concept ID |
|-----------------------------------------|------------|
| Acquired hallux valgus                  | 75911      |
| Acquired keratoderma                    | 137951     |
| Anal and rectal polyp                   | 73241      |
| Anomaly of jaw size                     | 45757682   |
| Benign paroxysmal positional vertigo    | 81878      |
| Bizarre personal appearance             | 4216219    |
| Burn of forearm                         | 133655     |
| Cachexia                                | 134765     |
| Calcaneal spur                          | 73560      |
| Cannabis abuse                          | 434327     |
| Changes in skin texture                 | 140842     |
| Chondromalacia of patella               | 81378      |
| Cocaine abuse                           | 432303     |
| Colostomy present                       | 4201390    |
| Complication due to Crohn's disease     | 46269889   |
| Complication of gastrostomy             | 434675     |
| Contact dermatitis                      | 134438     |
| Contusion of knee                       | 78619      |
| Crohn's disease                         | 201606     |
| Derangement of knee                     | 76786      |
| Developmental delay                     | 436077     |
| Deviated nasal septum                   | 377910     |
| Difficulty sleeping                     | 4115402    |
| Disproportion of reconstructed breast   | 45757370   |
| Effects of hunger                       | 433111     |
| Endometriosis                           | 433527     |
| Epidermoid cyst                         | 4170770    |
| Exhaustion due to excessive exertion    | 437448     |
| Feces contents abnormal                 | 4092896    |
| Feces contents abnormal                 | 4092896    |
| Foreign body in ear                     | 374801     |
| Foreign body in orifice                 | 259995     |
| Foreskin deficient                      | 4096540    |
| Galactosemia                            | 439788     |
| Ganglion cyst                           | 40481632   |
| Ganglion cyst                           | 40481632   |
| Genetic disorder carrier                | 4168318    |
| Hammer toe                              | 433577     |
| Hereditary thrombophilia                | 4231770    |
| High risk sexual behavior               | 4012570    |
| Homocystinuria                          | 4012934    |
| Impacted cerumen                        | 374375     |
| Impacted cerumen                        | 374375     |
| Impingement syndrome of shoulder region | 4344500    |
| Inadequate sleep hygiene                | 40481897   |
| Ingrowing nail                          | 139099     |
| Injury of knee                          | 444132     |
| Jellyfish poisoning                     | 4265896    |
| Kwashiorkor                             | 432593     |
| Lagophthalmos                           | 381021     |
| Late effect of contusion                | 434203     |
| Late effect of motor vehicle accident   | 438329     |
| Lipid storage disease                   | 4027782    |
| Lymphangioma                            | 433997     |
| Macular drusen                          | 4083487    |

(Continued on Next Page...)



Table 72: Negative outcome controls specified through condition occurrences that map to (a descendent of) the indicated concept ID (*continued*)

|                                                                             | Concept ID |
|-----------------------------------------------------------------------------|------------|
| Malingering                                                                 | 4051630    |
| Marfan's syndrome                                                           | 258540     |
| Mechanical complication of internal orthopedic device, implant AND/OR graft | 432798     |
| Melena                                                                      | 4103703    |
| Minimal cognitive impairment                                                | 439795     |
| Nicotine dependence                                                         | 4209423    |
| Nicotine dependence                                                         | 4209423    |
| Noise effects on inner ear                                                  | 377572     |
| Non-toxic multinodular goiter                                               | 136368     |
| Nonspecific tuberculin test reaction                                        | 40480893   |
| Nonspecific tuberculin test reaction                                        | 40480893   |
| Opioid abuse                                                                | 438130     |
| Opioid abuse                                                                | 438130     |
| Opioid intoxication                                                         | 4299094    |
| Passing flatus                                                              | 4091513    |
| Physiological development failure                                           | 437092     |
| Poisoning by tranquilizer                                                   | 433951     |
| Postviral fatigue syndrome                                                  | 4202045    |
| Presbyopia                                                                  | 373478     |
| Psychalgia                                                                  | 439790     |
| Ptotic breast                                                               | 81634      |
| Regular astigmatism                                                         | 380706     |
| Senile hyperkeratosis                                                       | 141932     |
| Social exclusion                                                            | 4019836    |
| Somatic dysfunction of lumbar region                                        | 36713918   |
| Splinter of face without major open wound                                   | 443172     |
| Sprain of ankle                                                             | 81151      |
| Strain of rotator cuff capsule                                              | 72748      |
| Symbolic dysfunction                                                        | 432436     |
| Tear film insufficiency                                                     | 378427     |
| Tobacco dependence syndrome                                                 | 437264     |
| Tooth loss                                                                  | 433244     |
| Toxic effect of lead compound                                               | 436876     |
| Toxic effect of tobacco and nicotine                                        | 440612     |
| Tracheostomy present                                                        | 4201387    |
| Unsatisfactory tooth restoration                                            | 45757285   |
| Verruca vulgaris                                                            | 140641     |
| Wrist joint pain                                                            | 4115367    |
| Wristdrop                                                                   | 440193     |
